# Supplementary material
Source: Royal Society of Chemistry journal article supplement (doi:10.1039/d6gc02186g)
Supplement: d6gc02186g1.pdf [file d6gc02186g1.pdf]

## Supplementary Information

### **Autocatalytic Depolymerization for Polyester Blended Textiles Waste**

Wei Chen<sup>1#</sup>, Huaxing Liang<sup>2#</sup>, Linna Chen<sup>1</sup>, Jiachen Dong<sup>1</sup>, Yunlong Bai<sup>1</sup>, Hanwei Shen<sup>1</sup>, Zhiguang Li<sup>1</sup>, Shaohai Fu<sup>1\*</sup>, Jingjing Cao<sup>1\*</sup>

<sup>1</sup>Key Laboratory of Special Protective Textiles, Ministry of Education, College of Textile Science and Engineering, Jiangnan University, Wuxi 214122, China.

<sup>2</sup>Department of Environmental Science and Engineering, University of Science and Technology of China, Hefei 230026, China.

#W. C. and H. L. contributed equally.

\*Corresponding author

Email: caoj@jiangnan.edu.cn (J. C.); shaohaiFu@jiangnan.edu.cn (S. F.)

## Table of Contents

### Supplemental experimental methods

#### Supplemental figures

**Figure S1.** Flowchart illustrating the depolymerization of PET.

**Figure S2.** (a) Catalytic performance of PET over tannic acid, chitosan, TMAEMC, 4,4-divalerate, PHMB, and SH-ANTI408. Conditions: PET (0.2 g), EG (1 g), 185°C, catalyst (4 mg). (b) Glycolysis performance of PET over SH-ANTI408. Conditions: PET (0.2 g), EG (1 g), 185°C, SH-ANTI408 (0.2 mg or 4 mg).

**Figure S3.** (a) X-ray diffraction pattern. (b)  $^1\text{H}$  NMR spectra in  $\text{DMSO-}d_6$ . (c) FT-IR spectra of ZPT and commercial antibacterial agents SH-ANTI408.

**Figure S4.** Optimizing glycolysis performance of PET over ZPT. Conditions: PET waste (0.2 g), ZPT (0.1 mg, 1 mg, 2 mg, 4 mg, and 6 mg), EG (1 g), temperature (155°C, 165°C, 175°C, 180°C, and 195°C), time (20 min, 40 min, 60 min, 80 min and 120 min).

**Figure S5.** Optimizing glycolysis performance of PET over ZPT. Conditions: PET waste (0.2 g), ZPT (0.1 mg, 1 mg, 2 mg, 4 mg, and 6 mg), EG (1 g), temperature (155°C, 165°C, 175°C, 180°C, and 195°C), time (20 min, 40 min, 60 min, 80 min and 120 min).

**Figure S6.**  $^1\text{H}$  NMR spectrum of a BHET recorded in  $\text{DMSO-}d_6$ .

**Figure S7.**  $^1\text{H}$  NMR spectrum of a dimer recorded in  $\text{DMSO-}d_6$ .

**Figure S8.** (a) Effect of temperature on the rate of PET glycolysis for ZPT. (b) Arrhenius plots of the rate constant of PET glycolysis for ZPT.

**Figure S9.**  $^1\text{H}$  NMR spectrum of a DMT recorded in  $\text{CDCl}_3$ .

**Figure S10.** Comparison of the experimental mass spectra of pristine ZPT and ZPT-EG species formed in ethylene glycol.

**Figure S11.** Gel permeation chromatography (GPC) of different reaction times over PET depolymerization.

**Figure S12.** Comparison of the experimental fourier transform infrared spectroscopy spectra of pristine ZPT and ZPT-EG species formed in ethylene glycol.

**Figure S13.** Comparison of the experimental local  $^1\text{H}$  NMR spectra of (a) pristine ZPT (b) EG and ZPT-EG species formed in ethylene glycol.

**Figure S14.** (a) ATR-FTIR spectra, (b) XRD patterns and (c) SEM of blended PET/Cotton before and after treatment. Reaction conditions: 0.2 g of Fiber/Cotton (PET/Cotton=75/25), 1 g of EG, 0.004 g of ZPT, 185 °C, 1 h.

**Figure S15.** (a) ATR-FTIR spectra, (b) XRD patterns, and (c) SEM of towel before and after treatment. Reaction conditions: 0.2 g of Towel (PET/cotton=50/50), 1 g of EG, 0.004 g of ZPT, 185 °C, 1 h.

**Figure S16.** (a) ATR-FTIR spectra, and (b) XRD patterns of blended textile PET/Nylon before and after treatment. Reaction conditions: 0.2 g of PET/Nylon (70/30), 1 g of EG, 0.004 g of ZPT, 185 °C, 1 h.

**Figure S17.** Flow chart of 10 g scale-up experiment. Reaction conditions: 10 g of mixed textile (PET/Cotton=70/30), 40 g of EG, 0.2 g of ZPT, 185 °C, 1 h.

**Figure S18.** <sup>1</sup>H NMR spectrum of a MDA recorded in CDCl<sub>3</sub>.

**Figure S19.** Flowsheet diagram from Aspen model for PET glycolysis Case 1.

**Figure S20.** Flowsheet diagram from Aspen model for the petroleum-based TPA synthesis route.

**Figure S21.** Comparison of (a) non-renewable energy use (NREU) and (b) global warming potential (GWP). TPA route refers to the BHET production route based on fossil-derived TPA via esterification.

**Figure S22.** Contribution analysis of LCA across 18 impact categories (EU: Europe).

**Figure S23.** (a, b) Comparison of NREU and GWP in different routes for PET textiles glycolysis. EU: Europe, CN: China, JP: Japan.

**Figure S24.** Comparison of minimum selling prices based on TPA routes, clean PET, waste PET, PET textiles, and references.

Supplemental tables

**Table S1.** Glycolysis effect of different antibacterial agents on PET.

**Table S2.** Optimization of catalytic glycolysis of PET.

**Table S3.** Comparison of the STY value of different catalysts for PET glycolysis.

**Table S4.** Comparison of the TOF value of different catalysts for PET glycolysis.

**Table S5.** Linear regression results for the data in Figure S5.

**Table S6.** Catalytic performance of different kinds of PET textile and mixed textile.

**Table S7.** Goal and scope of LCA.

**Table S8.** NREU values of each raw material of PET glycolysis used in the Open LCA.

**Table S9.** GWP values of each raw material of PET glycolysis used in the Open LCA.

**Table S10.** LCA results of case-CN recycling route.

**Table S11.** LCA results of case-EU recycling route.

**Table S12.** Comparative LCA results of case-CN recycling route and the petroleum-based TPA synthesis route.

**Table S13.** Comparative LCA results of case-EU recycling route and the petroleum-based TPA synthesis route.

**Table S14.** Cradle-to-gate LCA results contribution analysis of PET glycolysis, functional unit = 1 kg BHET flakes. In the context of EU.

**Table S15.** Cradle-to-gate LCA results contribution analysis of PET glycolysis, functional unit = 1 kg BHET flakes. In the context of CN.

**Table S16.** LCA results in glycolysis of post-consumer PET textiles, functional unit = 1 kg recycled BHET.

**Table S17.** LCA results in TPA route to produce BHET (TPA synthesis route), functional unit = 1 kg the petroleum-based TPA synthesis route.

**Table S18.** Material and energy input-output of collection, transport, and pretreatment of waste polyester textile, functional unit = 1 kg BHET flakes.

**Table S19.** Mass balance of post-consumer PET textiles glycolysis.

**Table S20.** Mass balance of petroleum-based TPA synthesis route.

**Table S20.** Mass balance of petroleum-based TPA synthesis route (continued).

**Table S21.** Details of the utilities with post-consumer PET textiles glycolysis and petroleum-based TPA synthesis route.

**Table S22.** Utility of post-consumer PET textiles glycolysis.

**Table S23.** Utility of virgin BHET route.

**Table S24.** Energy balance of post-consumer PET textiles glycolysis.

**Table S25.** Energy balance of virgin BHET route.

**Table S26.** Total equipment cost of PET recycling.

**Table S27.** Total equipment cost of petroleum-based TPA synthesis route.

**Table S28.** Total direct cost, total indirect cost, and total capital investment cost of clean PET, PET wastes, and textile waste recycling.

**Table S29.** Variable operating cost, fix operating cost, general expenses and total raw materials of clean PET, PET wastes, and textile waste recycling.

**Table S30.** Total direct cost, total indirect cost, and total capital investment cost of TPA route to produce BHET.

**Table S31.** Variable operating cost, fix operating cost, general expenses of TPA route to produce BHET.

**Table S32.** Total direct cost, total indirect cost, land, working capital and total capital investment cost of PET waste recycling.

**Table S33.** Total direct cost, total indirect cost, land, working capital and total capital investment cost of TPA route to produce BHET.

**Table S34.** Utility operation cost of clean PET recycling.

**Table S35.** Utility operation cost of PET waste recycling.

**Table S36.** Utility operation cost of textile waste recycling.

**Table S37.** Utility operation cost of TPA route to produce BHET.

**Table S38.** MSP of PET recycling, TPA route to produce BHET, and literature.

Supplemental references

## **Materials and methods**

**Materials:** PET polyester powder was purchased from Dongguan Tesulang Co., Ltd. in China, with a diameter of 150  $\mu\text{m}$ . Antibacterial agent SH-ANTI408 was purchased from Luyi Tanwei Industrial Co., Ltd. in Shanghai, China, and its main component is Zinc Pyrithione (ZPT). Ethanol, ethylene glycol, polyethylene glycol, tannic acid, chitosan, 4,4-bis (4-hydroxyphenyl) valeric acid (BHPVA), methacryloyloxyethyltrimethyl ammonium chloride (TMAEMC), polyhexamethylene biguanide hydrochloride (PHMB), N,N-dimethylformamide (DMF), dimethyl sulfoxide (DMSO), and deuterated DMSO were all purchased from Aladdin, polyhexamethylene biguanide hydrochloride was purchased from adamas, and all reagents were not further purified for use. Discarded clothing is collected and provided by the institute of special protective textile materials of Jiangnan University.

### **Characterization.**

**High performance liquid chromatography (HPLC):** The waters alliance e2695 high performance liquid chromatograph, equipped with 2998 PDA full wavelength detector and waters symmetry C18 (4.6 mm $\times$ 250 mm) column, was used for detection at 254 nm wavelength; The mobile phase was an equal volume of methanol water mixture with isocratic elution. The flow rate was 0.25 ml/min and the injection volume was 10  $\mu\text{L}$ . the BHET yield was quantitatively calculated by external standard method at the flow rate of 0.25 ml/min and the injection volume of 10  $\mu\text{L}$ .

**Fourier transform infrared spectrometer (FTIR):** The Thermo Nicolet IS10 Fourier Transform Infrared (FTIR) spectrometer, equipped with a diamond ATR (Attenuated Total Reflectance) accessory, was used to analyze the chemical structure changes of degradation products and the structure of blended textiles. The scanning range was set from 400 to 4000  $\text{cm}^{-1}$ , with a resolution of 4  $\text{cm}^{-1}$ . A total of 32 scans were performed for each sample. After subtracting the air background, the samples were directly placed in the ATR attachment for testing.

**Nuclear magnetic resonance (NMR):** 20 mg of sample was dissolved in 0.55 mL of deuterated DMSO and analyzed by  $^1\text{H}$  NMR using Bruker advance III HD 400 MHz fully digital nuclear magnetic resonance spectrometer.

**X-ray diffractometer (XRD):** The powder sample was ground and flattened on a low-background sample holder. The crystal structure was analyzed by scanning in the  $2\theta$  range of  $5^\circ$  to  $80^\circ$  using a Bruker D2 Phaser desktop X-ray diffractometer.

**Scanning electron microscope (SEM):** Hitachi Regulus 8100 cold field emission scanning electron microscope was used to observe the microstructure of the samples.

**Matrix-assisted laser desorption/ionization time of flight mass spectrometry (MALDI-TOF MS):** The sample was dissolved in DMF solvent, mix 1  $\mu\text{L}$  sample with 1  $\mu\text{L}$  HCCA matrix, then the mixture was analyzed by MicroFlex LT/SH MALDI-TOF mass spectrometer (mass range  $\geq 500$  kDa, 337 nm nitrogen laser, frequency 1-60 Hz) for determination.

**Inductively coupled plasma mass spectrometry (ICP-MS)** was used to determine the content of metal ions in the product.

Comprehensive life-cycle assessment (LCA) of PET recycling.

The recycling process was simulated using Aspen Plus V11 with the POLYSL model. We evaluated the impacts of the entire process on factors, such as human health, ecosystems, and resources using OpenLCA (Version, 1.10.3). We emphasize that the primary objective of the LCA was to compare the relative environmental impacts between conventional PET disposal methods and our proposed recycling process. While updates to the background database may influence the absolute values, the comparative trends and overarching conclusions are expected to remain valid. Our system boundary encompasses recycling framework, including collection and transportation and encompassing depolymerization. To gain a broader understanding of the environmental impacts in different global contexts, we evaluated the environmental impacts in two different geographical regions (China and Europe), with a specifically focusing on NREU and GWP. The chemical recycling processes were simulated on an industrial scale with an annual treatment of 100,000 tons of waste PET, using Aspen Plus V11 to obtain the mass balance and energy consumption. More details on the data and assumptions we applied in the LCA analysis are documented in the Supplementary Note 1 section.

Details of techno-economic analysis (TEA).

The Aspen Process Economic Analyzer V11 was used to determine the capital and operating costs for conventional chemical plants. Minimum selling price (MSP), i.e., the selling price of the product when the net present value is zero. Heat integration for BHET monomer production was performed using Aspen Energy Analyzer (Aspen Technology 2019). Scenario analysis of key process parameters was performed to account for uncertainties. Additional TEA assumptions are provided in Supplementary Note 2.

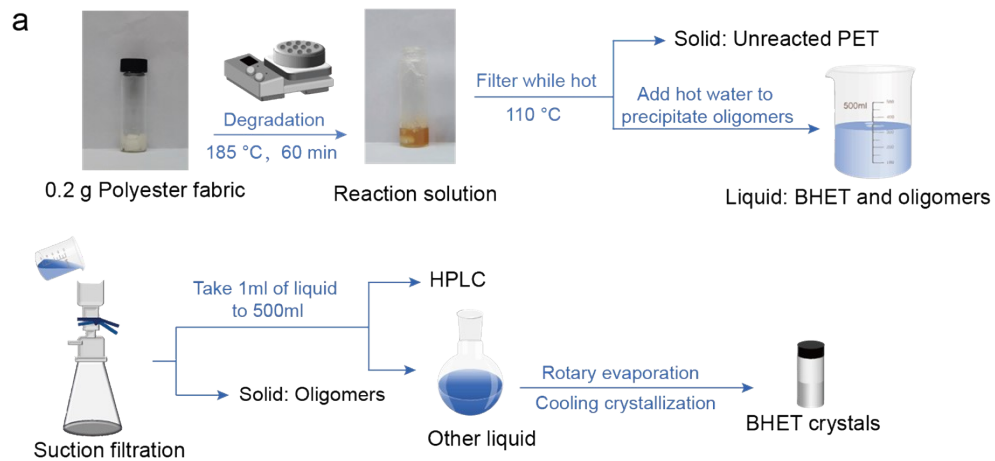

Figure S1. Flowchart illustrating the depolymerization of PET.

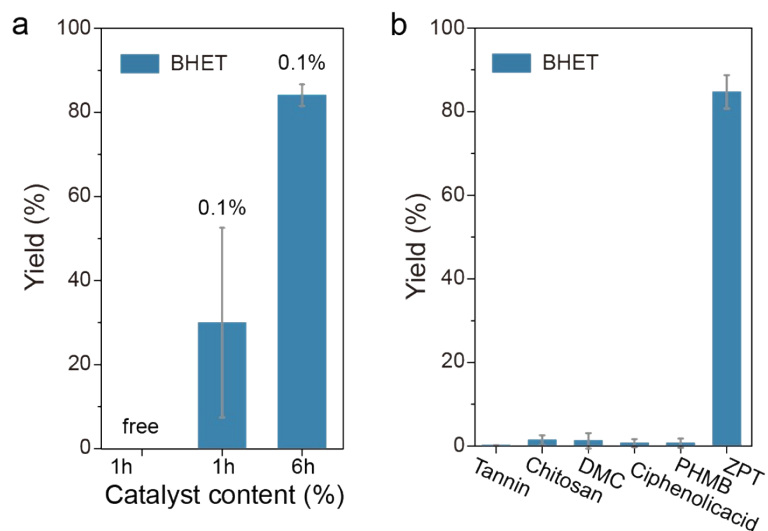

Figure S2. (a) Catalytic performance of PET over tannic acid, chitosan, TMAEMC, 4,4-divalerate, PHMB, and SH-ANTI408. Conditions: PET (0.2 g), EG (1 g), 185°C, catalyst (4 mg). (b) Glycolysis performance of PET over SH-ANTI408. Conditions: PET (0.2 g), EG (1 g), 185°C, SH-ANTI408 (0.2 mg or 4 mg).

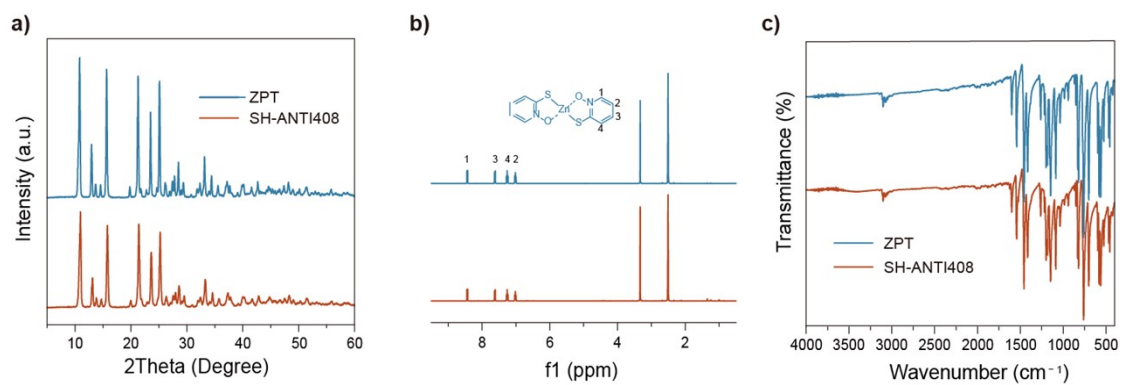

Figure S3. (a) X-ray diffraction pattern. (b) <sup>1</sup>H NMR spectra in DMSO-*d*<sub>6</sub>. (c) FT-IR spectra of ZPT and commercial antibacterial agents SH-ANTI408.

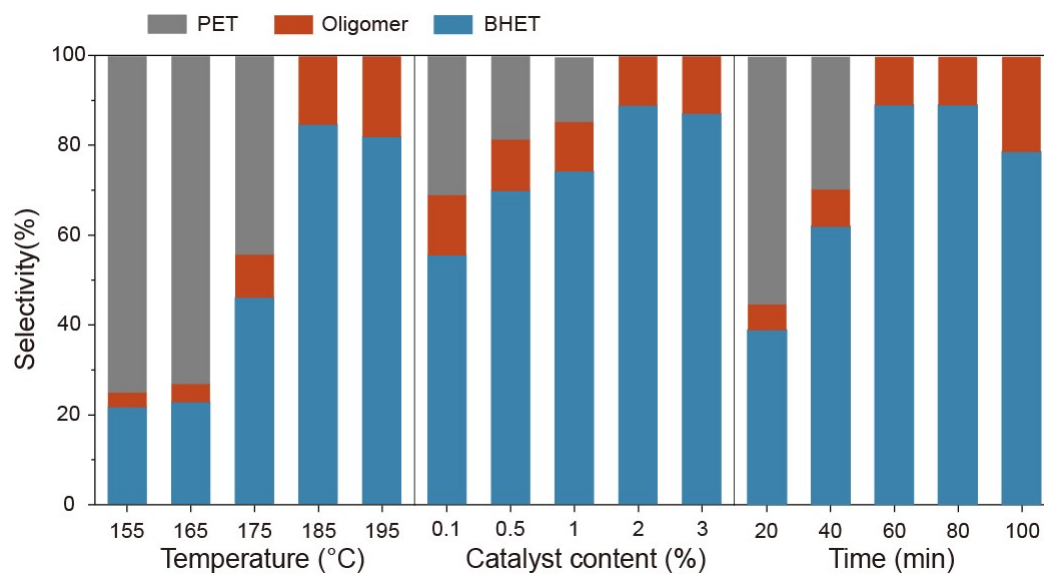

Figure S4. Optimizing glycolysis performance of PET over ZPT. Conditions: PET waste (0.2 g), ZPT (0.1 mg, 1 mg, 2 mg, 4 mg, and 6 mg), EG (1 g), temperature (155°C, 165°C, 175°C, 180°C, and 195°C), time (20 min, 40 min, 60 min, 80 min and 120 min).

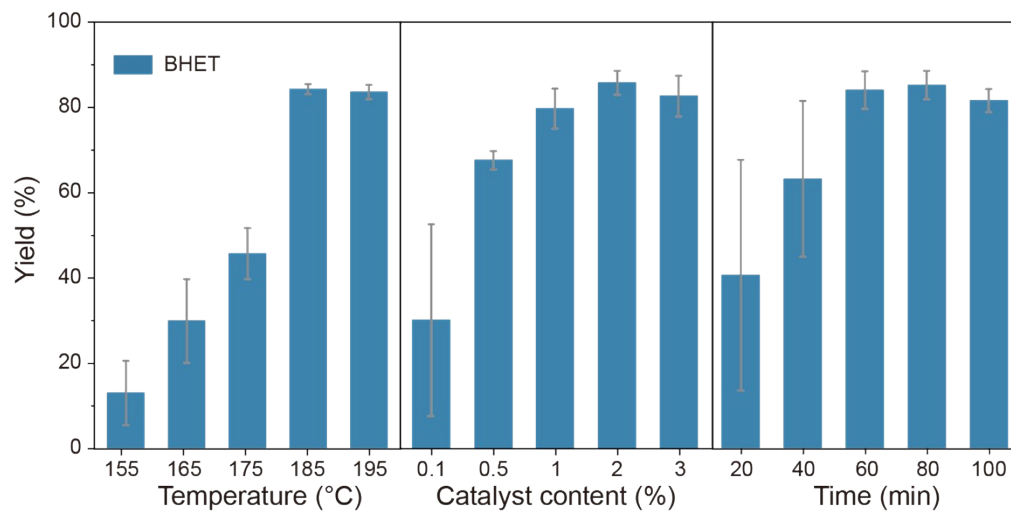

Figure S5. Optimizing glycolysis performance of PET over ZPT. Conditions: PET waste (0.2 g), ZPT (0.1 mg, 1 mg, 2 mg, 4 mg, and 6 mg), EG (1 g), temperature (155°C, 165°C, 175°C, 180°C, and 195°C), time (20 min, 40 min, 60 min, 80 min and 120 min).

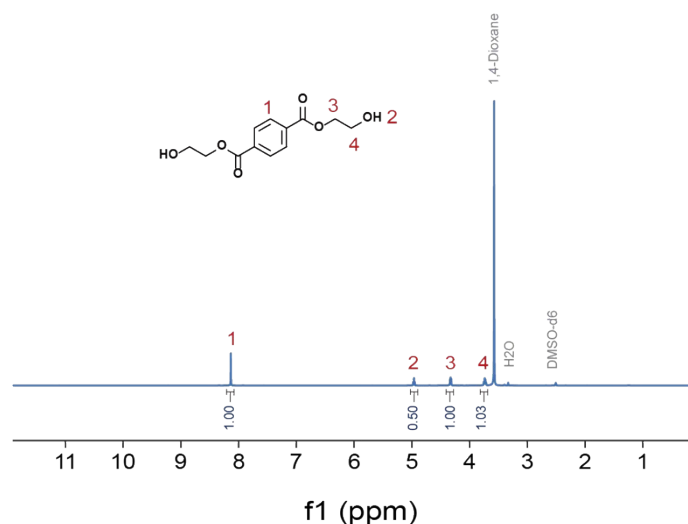

Figure S6. <sup>1</sup>H NMR spectrum of a BHET recorded in DMSO-*d*<sub>6</sub>.

<sup>1</sup>H NMR (400 MHz, DMSO-*d*<sub>6</sub>,  $\delta$ ): 8.11 (s, 4H, CH), 4.99 (t, 2H; OH), 4.32 (t, 4H; O-CH<sub>2</sub>), 3.72 (q, 4H; CH<sub>2</sub>-OH)

The single signal observed at  $\delta$ =8.11 ppm corresponds to the four symmetric aromatic protons of the benzene ring. Additionally, the triplet peak at  $\delta$ =4.32 ppm and the quartet peak at  $\delta$ =3.72 ppm represents the methylene protons of COO-CH<sub>2</sub> and CH<sub>2</sub>-OH, respectively. The triplet peak at  $\delta$ =4.99 ppm indicates the presence of protons from the hydroxyl group. The integrated peak area ratios of these signals are 1.00 : 0.50 : 1.00 : 1.03 (Aromatic H : OH : COO-CH<sub>2</sub> : CH<sub>2</sub>-OH), which are in excellent agreement with the theoretical values for pure BHET (1.00 : 0.50 : 1.00 : 1.00).

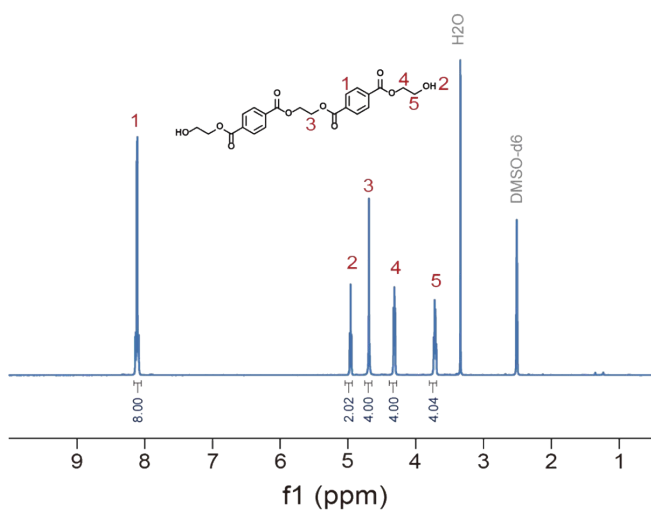

Figure S7.  $^1\text{H}$  NMR spectrum of a dimer recorded in  $\text{DMSO-}d_6$ .

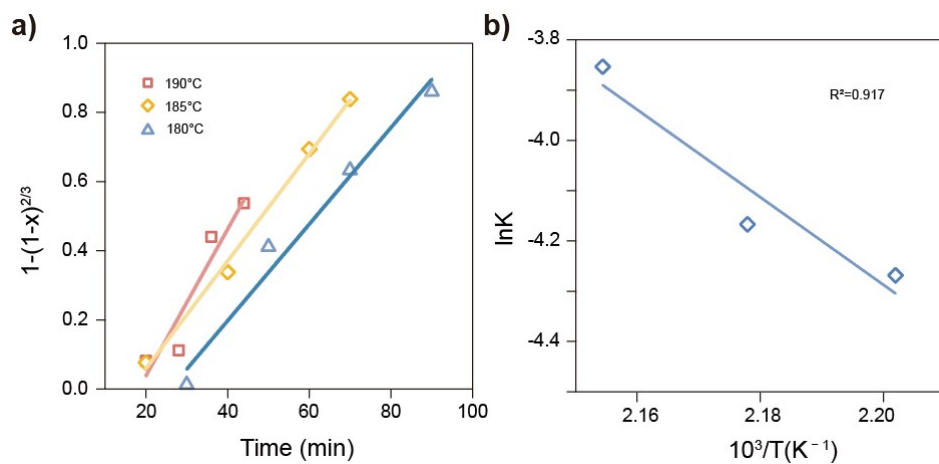

Figure S8. (a) Effect of temperature on the rate of PET glycolysis for ZPT. (b) Arrhenius plots of the rate constant of PET glycolysis for ZPT.

Note: Kinetics of the PET glycolysis. The depolymerization kinetics of polymers are usually considered to be first order.

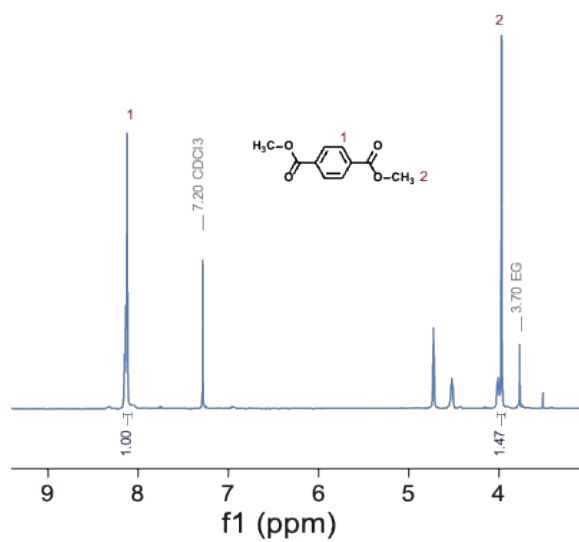

Figure S9.  $^1\text{H}$  NMR spectrum of a DMT recorded in  $\text{CDCl}_3$ .

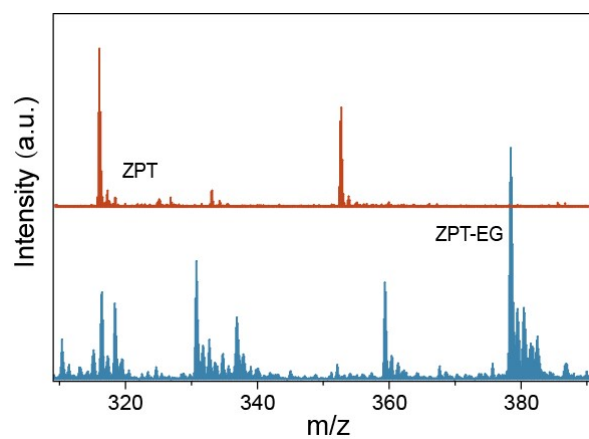

Figure S10. Comparison of the experimental mass spectra of pristine ZPT and ZPT-EG species formed in ethylene glycol.

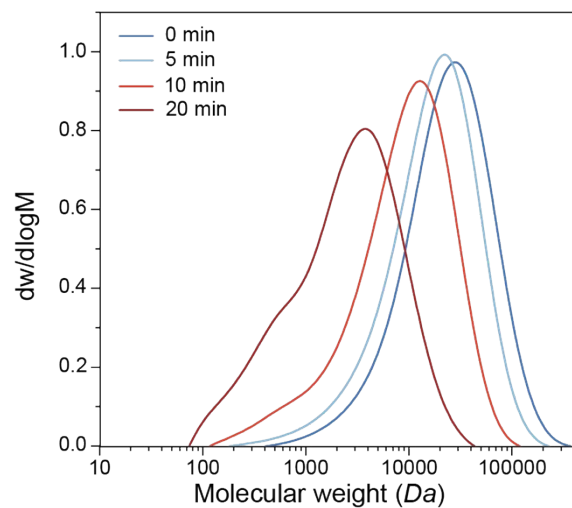

Figure S11. Gel permeation chromatography (GPC) of different reaction times over PET depolymerization.

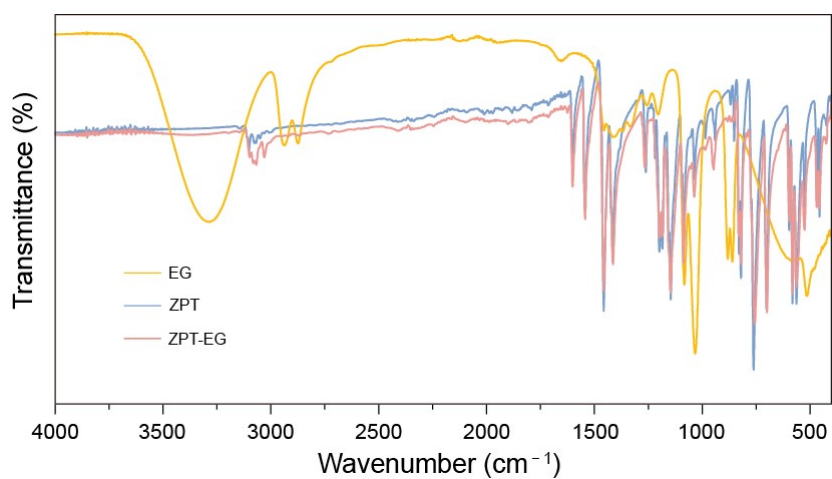

Figure S12. Comparison of the experimental fourier transform infrared spectroscopy spectra of pristine ZPT and ZPT-EG species formed in ethylene glycol.

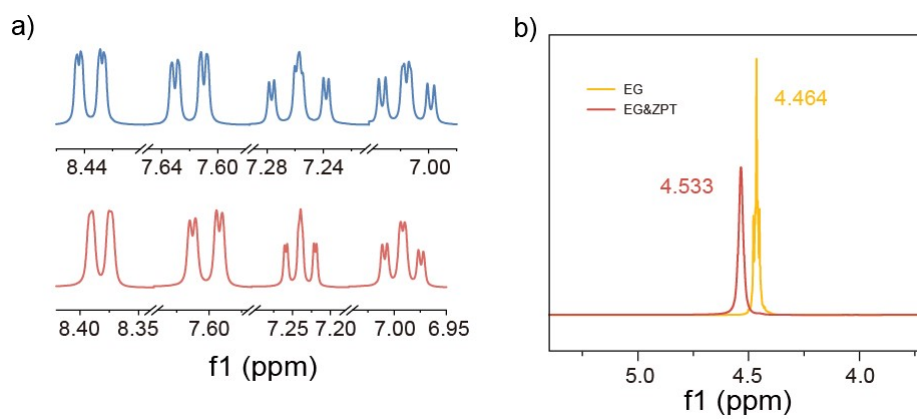

Figure S13. Comparison of the experimental local  $^1\text{H}$  NMR spectra of (a) pristine ZPT (b) EG and ZPT-EG species formed in ethylene glycol.

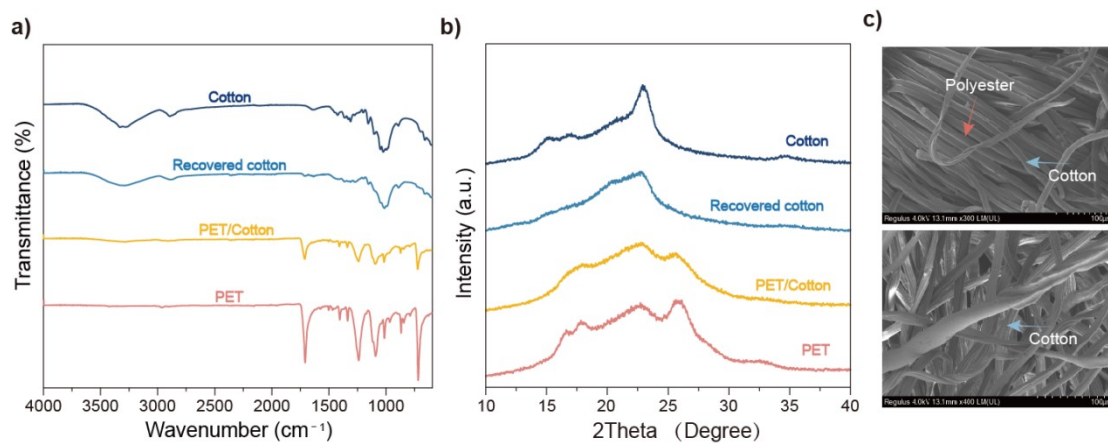

Figure S14. (a) ATR-FTIR spectra, (b) XRD patterns and (c) SEM of blended PET/Cotton before and after treatment. Reaction conditions: 0.2 g of Fiber/Cotton (PET/Cotton=75/25), 1 g of EG, 0.004 g of ZPT, 185 °C, 1 h.

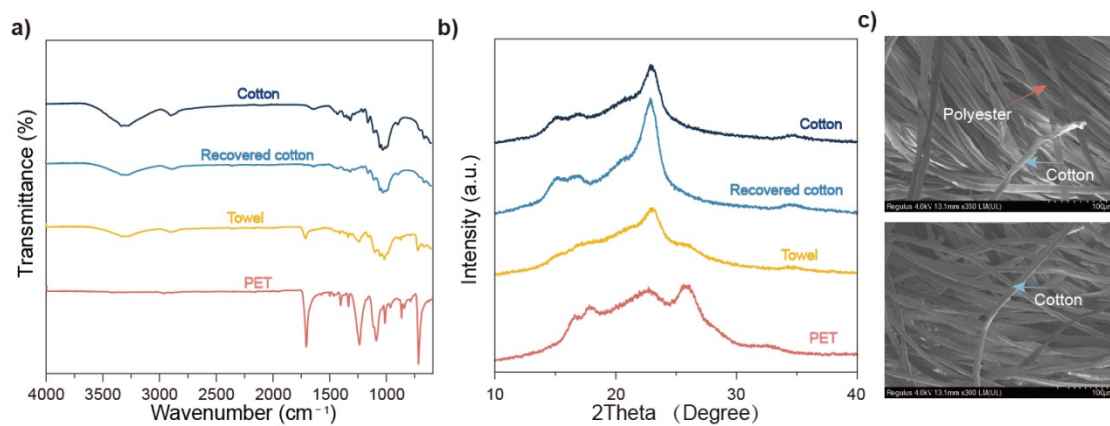

Figure S15. (a) ATR-FTIR spectra, (b) XRD patterns, and (c) SEM of towel before and after treatment. Reaction conditions: 0.2 g of Towel (PET/cotton=50/50), 1 g of EG, 0.004 g of ZPT, 185 °C, 1 h.

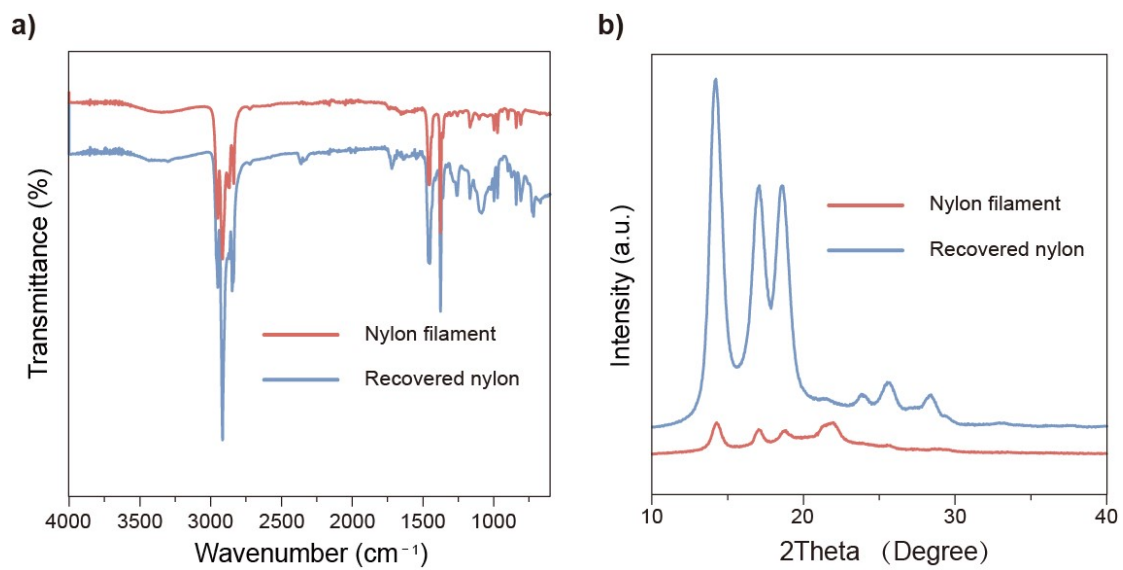

Figure S16. (a) ATR-FTIR spectra, and (b) XRD patterns of blended textile PET/Nylon before and after treatment. Reaction conditions: 0.2 g of PET/Nylon (70/30), 1 g of EG, 0.004 g of ZPT, 185 °C, 1 h.

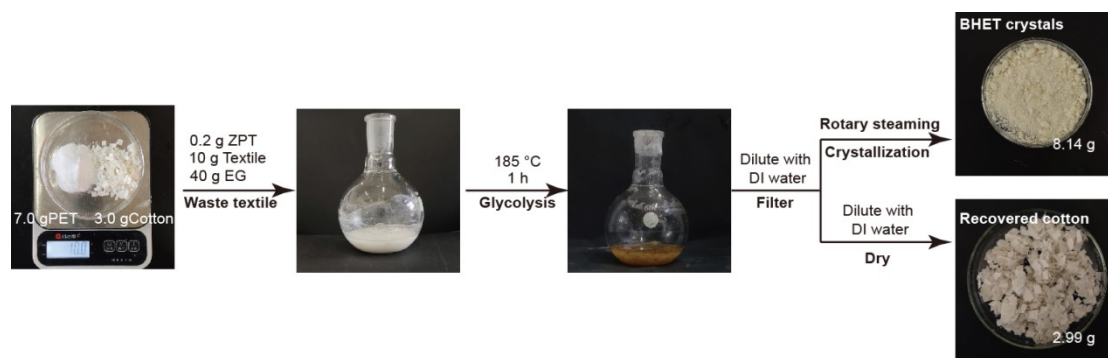

Figure S17. Flow chart of 10 g scale-up experiment. Reaction conditions: 10 g of mixed textile (PET/Cotton=70/30), 40 g of EG, 0.2 g of ZPT, 185 °C, 1 h.

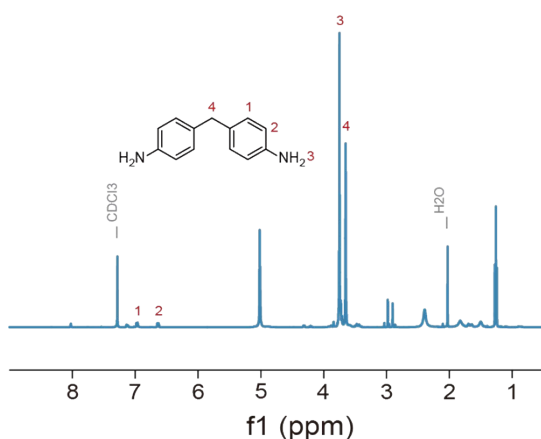

Figure S18. <sup>1</sup>H NMR spectrum of a MDA recorded in CDCl<sub>3</sub>.

In the primary stage targeting the polyester/spandex blend, the reaction temperature was initially maintained at 160 °C to selectively melt the spandex component. This molten spandex was mechanically separated from the intact polyester fabric directly within the reactor, permitting the subsequent glycolysis of the PET fraction to proceed without interference.

The isolated spandex fraction was then independently reacted with EG at 200 °C for 1 hour, during which the mixture transitioned to a brownish-yellow hue. Upon cooling the mixture to room temperature, the resultant polyol component spontaneously solidified, forming a distinct upper coagulated layer. The lower liquid phase was carefully decanted into a separate beaker. To isolate the target diamine, a 0.1 mol/L aqueous hydrochloric acid solution was added dropwise until the system reached a pH of 4. This acidified mixture was stirred for 30 minutes and subsequently filtered to yield a transparent solution. The acidic filtrate was then carefully neutralized back to pH 7 using a 0.1 mol/L aqueous sodium hydroxide solution. Finally, the solvent water was removed via rotary evaporation, and the resulting solid residue was dried in a vacuum oven at 60 °C for 8 hours to yield the pure 4,4'-methylenedianiline (MDA) monomer.

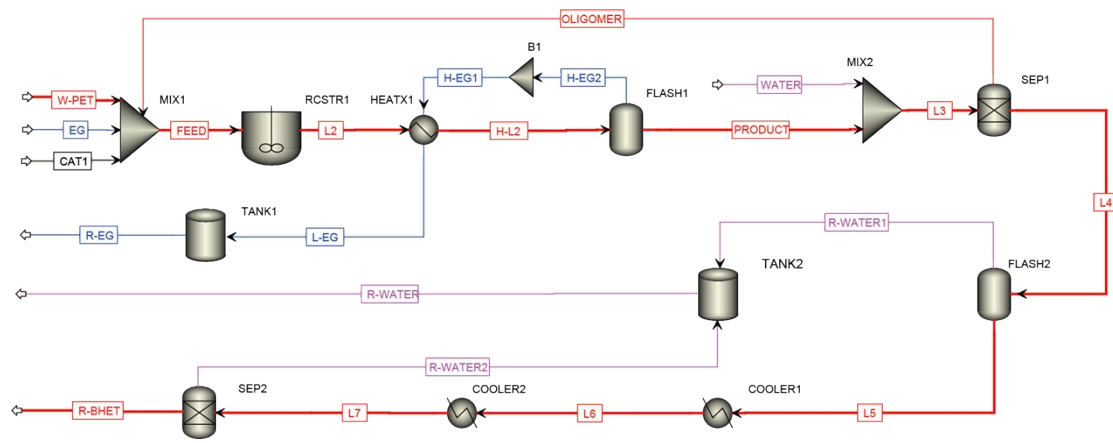

Figure S19. Flowsheet diagram from Aspen model for PET glycolysis Case 1.

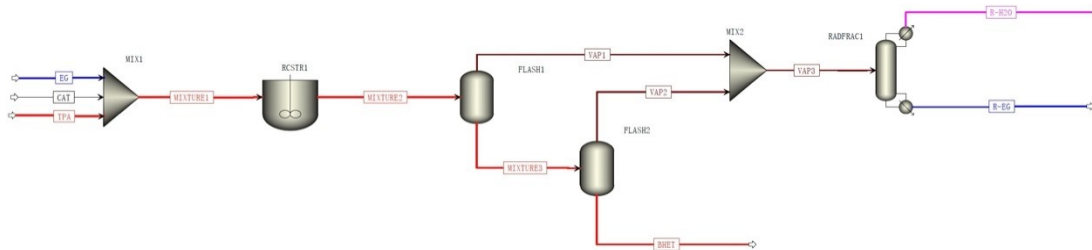

Figure S20. Flowsheet diagram from Aspen model for the petroleum-based TPA synthesis route.

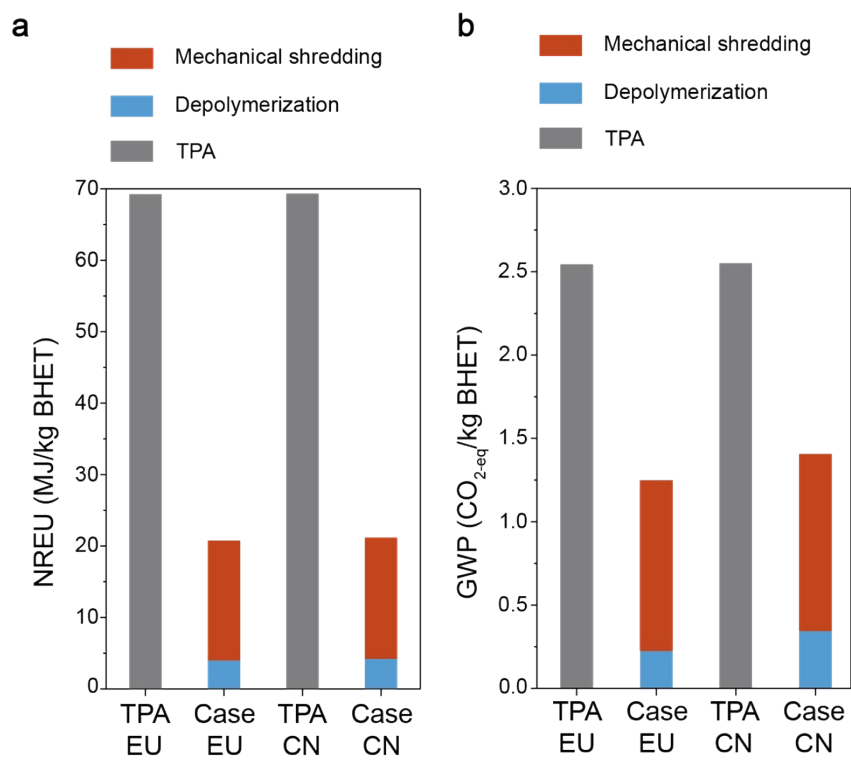

Figure S21. Comparison of (a) non-renewable energy use (NREU) and (b) global warming potential (GWP). TPA route refers to the BHET production route based on fossil-derived TPA via esterification.

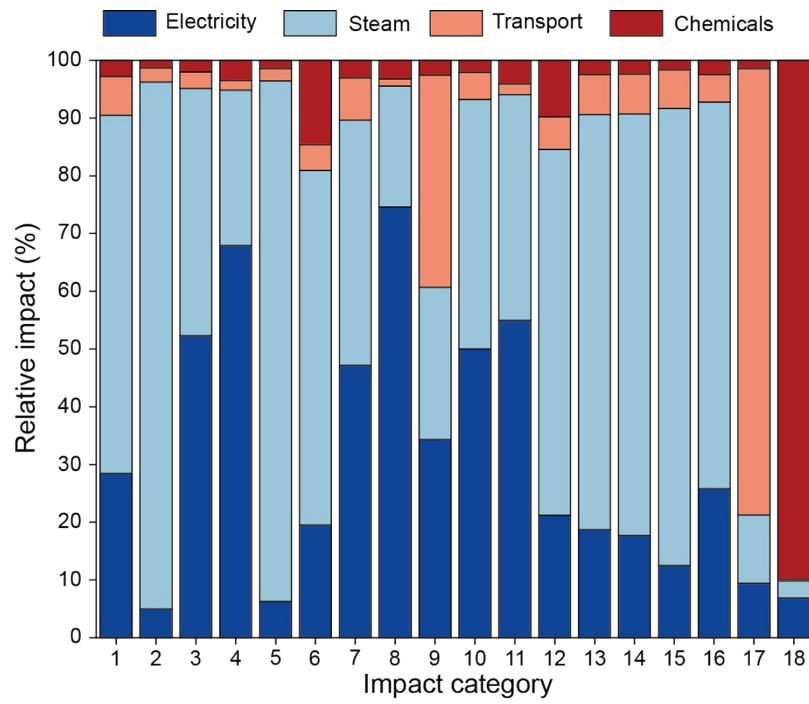

Figure S22. Contribution analysis of LCA across 18 impact categories (EU: Europe).

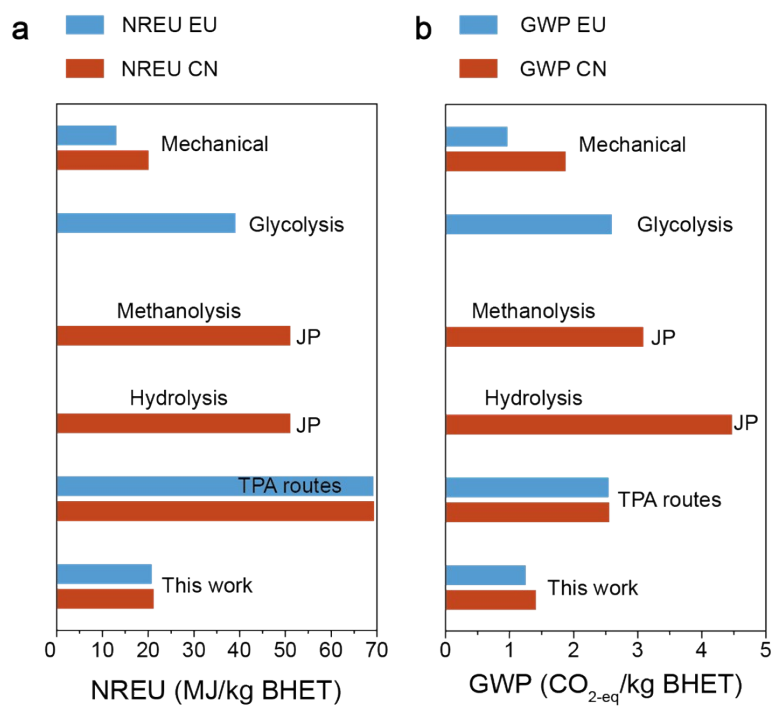

Figure S23. (a, b) Comparison of NREU and GWP in different routes for PET textiles glycolysis. EU: Europe, CN: China, JP: Japan.

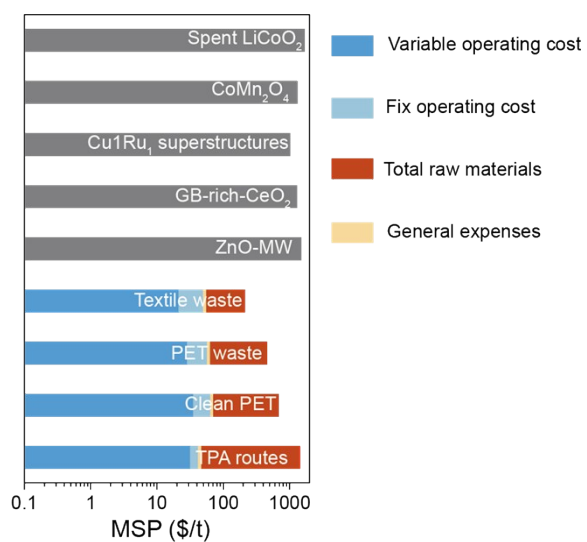

Figure S24. Comparison of minimum selling prices based on TPA routes, clean PET, waste PET, PET textiles, and references.

**Table S1.** Glycolysis effect of different antibacterial agents on PET.

| Entry | Catalyst | t<br>(min) | PET<br>conv. (%) | BHET<br>yield (%)       | Oligomer<br>yield (%) |
|-------|----------|------------|------------------|-------------------------|-----------------------|
| 1     | Tannin   | 60         | 0.04             | 0.14<br>0.15<br>0.22    | 3.98                  |
| 2     | Chitosan | 60         | 0.01             | 0.16<br>2.02<br>2.14    | 1.08                  |
| 3     | TMAEMC   | 60         | 0.08             | 0.18<br>0.23<br>3.4     | 4.1                   |
| 4     | BHPVA    | 60         | 0.07             | 0.07<br>0.19<br>1.8     | 5.36                  |
| 5     | PHMB     | 60         | 0.05             | 0.09<br>2.01            | 3.05                  |
| 6     | ZTP      | 60         | 0.99             | 81.31<br>83.74<br>89.28 | 10.9                  |

Reaction conditions: PET waste (0.2 g), antibacterial agents (4 mg), ethylene glycol (1 g), temperature (185 °C), time (1 h).

**Table S2.** Optimization of catalytic glycolysis of PET.

| Entry | Temp.<br>(°C) | t<br>(min) | m <sub>cat</sub> /m <sub>PET</sub><br>(mg/g) | PET<br>conv. (%) | BHET<br>yield (%)                | Oligomer<br>yield (%) |
|-------|---------------|------------|----------------------------------------------|------------------|----------------------------------|-----------------------|
| 1     | 185           | 20         | 4/0.2                                        | 44.72            | 14.38<br>38.93<br>68.66<br>45.56 | 5.80                  |
| 2     | 185           | 40         | 4/0.2                                        | 70.40            | 62.14<br>82.23<br>81.26          | 8.26                  |
| 3     | 185           | 60         | 4/0.2                                        | 100              | 82.05<br>89.28<br>83.24          | 10.71                 |
| 4     | 185           | 80         | 4/0.2                                        | 100              | 83.64<br>89.26<br>78.85          | 10.72                 |
| 5     | 185           | 100        | 4/0.2                                        | 100              | 82.04<br>84.27<br>13.02          | 21.15                 |
| 6     | 185           | 60         | 0.2/0.2                                      | 69.10            | 21.38<br>55.59<br>65.77          | 13.51                 |
| 7     | 185           | 60         | 1/0.2                                        | 81.5             | 67.09<br>70.00<br>74.39          | 11.5                  |
| 8     | 185           | 60         | 2/0.2                                        | 85.7             | 81.07<br>83.24<br>83.90          | 11.06                 |
| 9     | 185           | 60         | 4/0.2                                        | 100              | 84.54<br>89.10<br>77.75          | 10.9                  |
| 10    | 185           | 60         | 6/0.2                                        | 100              | 83.17<br>87.25<br>81.36          | 12.75                 |
| 11    | 185           | 360        | 0.2/0.2                                      | 100              | 84.64<br>86.41<br>8.22           | 13.59                 |
| 12    | 155           | 60         | 4/0.2                                        | 24.83            | 8.90<br>21.59<br>22.70           | 3.24                  |
| 13    | 165           | 60         | 4/0.2                                        | 26.76            | 25.68<br>41.00<br>39.34          | 4.06                  |
| 14    | 175           | 60         | 4/0.2                                        | 55.76            | 46.09                            | 9.68                  |

|    |     |    |       |     |       |       |
|----|-----|----|-------|-----|-------|-------|
|    |     |    |       |     | 51.31 |       |
|    |     |    |       |     | 82.73 |       |
| 15 | 185 | 60 | 4/0.2 | 100 | 84.71 | 15.12 |
|    |     |    |       |     | 84.88 |       |
|    |     |    |       |     | 82.07 |       |
| 16 | 195 | 60 | 4/0.2 | 100 | 83.01 | 17.93 |
|    |     |    |       |     | 85.33 |       |

---

Reaction condition: PET waste (0.2 g), ZPT(4 mg), EG (1 g.), temperature (185 °C), time (1 h).

**Table S3.** Comparison of the STY value of different catalysts for PET glycolysis.

|                                                              | Catalyst                                                | Temp.<br>(°C)                                                        | t<br>(min) | m <sub>cat</sub><br>(g) | BHET<br>yield (%) | STY<br>g <sub>BHET</sub> g <sub>cat</sub> <sup>-1</sup> h <sup>-1</sup> |        |
|--------------------------------------------------------------|---------------------------------------------------------|----------------------------------------------------------------------|------------|-------------------------|-------------------|-------------------------------------------------------------------------|--------|
|                                                              | This work                                               | 185                                                                  | 60         | 0.004                   | 89.2              | 58.87                                                                   |        |
|                                                              |                                                         | 185                                                                  | 72         | 0.002                   | 87.6              | 119.89                                                                  |        |
|                                                              |                                                         | 185                                                                  | 60         | 0.0005                  | 56.4              | 740.83                                                                  |        |
| Lower<br>glycolysis<br>temperature                           | Cyanamide <sup>1</sup>                                  | 150                                                                  | 480        | 0.1                     | 80.2              | 2.65                                                                    |        |
|                                                              | Cyanamide <sup>1</sup>                                  | 160                                                                  | 480        | 0.1                     | 86.7              | 2.84                                                                    |        |
|                                                              | [bmim] <sub>2</sub> [CoCl <sub>4</sub> ] <sup>2</sup>   | 170                                                                  | 240        | 1                       | 78.0              | 1.29                                                                    |        |
|                                                              | [amim][ZnCl <sub>3</sub> ] <sup>3</sup>                 | 175                                                                  | 75         | 0.5                     | 80.8              | 8.47                                                                    |        |
|                                                              | Mn <sub>2</sub> LCl <sub>2</sub> <sup>4</sup>           | 180                                                                  | 252        | 0.002                   | 92.7              | 313.62                                                                  |        |
|                                                              | DP ZIF-8 <sup>5</sup>                                   | 180                                                                  | 240        | 0.02                    | 76.1              | 25.17                                                                   |        |
|                                                              | Cobalt Nanoparticles <sup>6</sup>                       | 180                                                                  | 180        | 0.06                    | 77.1              | 22.64                                                                   |        |
|                                                              | 1Mn/Zn <sup>7</sup>                                     | 180                                                                  | 150        | 0.025                   | 93.6              | 99.06                                                                   |        |
|                                                              | ZnVI <sup>8</sup>                                       | 180                                                                  | 240        | 0.003                   | 91.2              | 30.10                                                                   |        |
|                                                              | PIL-Zn(OAc) <sub>2</sub> <sup>9</sup>                   | 180                                                                  | 20         | 0.3                     | 91.4              | 60.80                                                                   |        |
|                                                              | NH <sub>4</sub> HCO <sub>3</sub> <sup>10</sup>          | 180                                                                  | 360        | 0.02                    | 84.7              | 1.78                                                                    |        |
| Same<br>glycolysis<br>temperature                            | TBD : MSA <sup>11</sup>                                 | 180                                                                  | 180        | 0.25                    | 89.9              | 0.79                                                                    |        |
|                                                              | r-Zn-MOF74-NT <sup>12</sup>                             | 190                                                                  | 60         | 0.001                   | 78.4              | 1037.17                                                                 |        |
|                                                              | Pro/Zn(Ac) <sub>2</sub> <sup>13</sup>                   | 190                                                                  | 60         | 0.1                     | 87.2              | 57.55                                                                   |        |
|                                                              | Cyanamide <sup>1</sup>                                  | 190                                                                  | 150        | 0.1                     | 95.2              | 10.05                                                                   |        |
|                                                              | ZnO-Fe <sub>3</sub> O <sub>4</sub> HMNAs <sup>14</sup>  | 190                                                                  | 30         | 0.1                     | 92.3              | 72.61                                                                   |        |
|                                                              | ZIF8-Fe <sub>3</sub> O <sub>4</sub> HMNAs <sup>14</sup> | 190                                                                  | 20         | 0.1                     | 85.2              | 101.55                                                                  |        |
|                                                              | GB-rich CeO <sub>2</sub> <sup>15</sup>                  | 190                                                                  | 15         | 0.02                    | 93.4              | 46.95                                                                   |        |
|                                                              | [Bmim]OH <sup>16</sup>                                  | 190                                                                  | 120        | 0.1                     | 71.8              | 9.39                                                                    |        |
|                                                              | [C <sub>6</sub> TMG]Cl/ZnCl <sub>2</sub> <sup>17</sup>  | 195                                                                  | 70         | 0.5                     | 93.0              | 10.61                                                                   |        |
|                                                              | Fe <sub>3</sub> O <sub>4</sub> -CP <sup>18</sup>        | 195                                                                  | 120        | 0.005                   | 93.5              | 123.69                                                                  |        |
|                                                              |                                                         | CeO <sub>2</sub> -Fe <sub>3</sub> O <sub>4</sub> HMNAs <sup>14</sup> | 197        | 45                      | 0.1               | 75.6                                                                    | 50.03  |
|                                                              |                                                         | Ch/Zn(2:1) <sup>19</sup>                                             | 196        | 150                     | 0.04              | 94.2                                                                    | 12.44  |
|                                                              | EG critical<br>temperature                              | ZnO-Waved <sup>20</sup>                                              | 210        | 45                      | 0.005             | 95.0                                                                    | 167.57 |
| Fe <sub>3</sub> O <sub>4</sub> Nanodispersions <sup>21</sup> |                                                         | 210                                                                  | 30         | 0.12                    | 93.4              | 123.03                                                                  |        |
|                                                              | PW12@ UiO-67 <sup>22</sup>                              | 240                                                                  | 60         | 0.002                   | 95.0              | 314.19                                                                  |        |
| PET<br>melting<br>temperature                                | ZnMn <sub>2</sub> O <sub>4</sub> <sup>23</sup>          | 260                                                                  | 60         | 0.01                    | 92.2              | 92                                                                      |        |
|                                                              | GO-Mn <sub>3</sub> O <sub>4</sub> <sup>24</sup>         | 300                                                                  | 80         | 0.01                    | 96.4              | 64.2                                                                    |        |
|                                                              | γ-Fe <sub>2</sub> O <sub>3</sub> <sup>25</sup>          | 300                                                                  | 60         | 0.05                    | 90                | 26.4                                                                    |        |

**Table S4.** Comparison of the TOF value of different catalysts for PET glycolysis.

| Catalyst                                              | Temp. (°C) | T (min) | BHET yield (%) | TOF (h <sup>-1</sup> ) |
|-------------------------------------------------------|------------|---------|----------------|------------------------|
|                                                       | 185        | 60      | 89.2           | 73.63                  |
| This work                                             | 185        | 60      | 87.6           | 149.96                 |
|                                                       | 185        | 60      | 56.4           | 926.62                 |
| Cyanamide <sup>1</sup>                                | 190        | 150     | 95.1           | 1.66                   |
| [amim][ZnCl <sub>3</sub> ] <sup>3</sup>               | 175        | 75      | 80.8           | 9.81                   |
| Mn <sub>2</sub> LCl <sub>2</sub> <sup>4</sup>         | 180        | 252     | 92.7           | 675.39                 |
| 1Mn/Zn <sup>7</sup>                                   | 180        | 150     | 93.6           | 1032.2                 |
| NH <sub>4</sub> HCO <sub>3</sub> <sup>10</sup>        | 180        | 360     | 84.7           | 0.55                   |
| ZnO-Waved <sup>21</sup>                               | 210        | 45      | 95.0           | 53.70                  |
| [Bmim]OH <sup>16</sup>                                | 190        | 120     | 71.2           | 5.8                    |
| [Ch][OAc] <sup>26</sup>                               | 180        | 240     | 85.2           | 3.62                   |
| [Ch] <sub>3</sub> [PO <sub>4</sub> ] <sup>27</sup>    | 180        | 240     | 82             | 1.17                   |
| TBD <sup>28</sup>                                     | 190        | 10.2    | 95.0           | 57                     |
| [Mmim][OAc] <sup>29</sup>                             | 185        | 120     | 34             | 0.69                   |
| Zn(OAc) <sub>2</sub> ·2H <sub>2</sub> O <sup>30</sup> | 198        | 480     | 88             | 4.57                   |
| CoCl <sub>2</sub> ·6H <sub>2</sub> O <sup>30</sup>    | 190        | 180     | 65             | 26.85                  |
| MnCl <sub>2</sub> ·4H <sub>2</sub> O <sup>30</sup>    | 190        | 180     | 48             | 16.49                  |
| ZrCl <sub>4</sub> <sup>30</sup>                       | 190        | 180     | 69             | 27.92                  |
| Ni(COD) <sub>2</sub> <sup>30</sup>                    | 190        | 180     | 55             | 26.26                  |
| Cu(OAc) <sub>2</sub> <sup>30</sup>                    | 190        | 20      | 30.09          | 14.23                  |

**Table S5.** Linear regression results for the data in Figure S5.

| Temp. (°C) | equation           | R <sup>2</sup> | Ea(KJ mol <sup>-1</sup> ) | R <sup>2</sup> |
|------------|--------------------|----------------|---------------------------|----------------|
| 185        | $y=0.0212x-0.3851$ | 0.9046         |                           |                |
| 180        | $y=0.0155x-0.2509$ | 0.9958         | 72.27                     | 0.917          |
| 175        | $y=0.014x-0.3607$  | 0.975          |                           |                |

**Table S6.** Catalytic performance of different kinds of PET textile and mixed textile.

| Entry | Textiles-type             | t<br>(min) | PET<br>conv. (%) | BHET<br>yield (%) | Oligomer<br>yield (%) |
|-------|---------------------------|------------|------------------|-------------------|-----------------------|
| 1     | Pure polyester textile    | 60         | 100              | 89.3              | 10.7                  |
| 2     | Quick drying clothes      | 60         | 100              | 86.7              | 13.3                  |
| 3     | Purple textile            | 60         | 100              | 87.2              | 12.8                  |
| 4     | Light green textile       | 60         | 100              | 90.5              | 9.5                   |
| 5     | Blue gown                 | 60         | 100              | 88.8              | 11.2                  |
| 6     | Black gown                | 60         | 100              | 87.9              | 12.1                  |
|       | 65% Cotton +30%           |            |                  |                   |                       |
| 7     | Polyester + 5%<br>Spandex | 60         | 100              | 86.5              | 13.5                  |
| 8     | Fiber/Cotton              | 60         | 100              | 87.6              | 12.4                  |
| 9     | Towel                     | 90         | 100              | 86.4              | 13.6                  |
| 10    | PET/Nylon                 | 90         | 100              | 88.7              | 11.3                  |
| 11    | PET/Spandex               | 180        | 100              | 80.3              | 19.7                  |
| 12    | PET/Cotton                | 60         | 100              | 87.90             | 12.10                 |

Reaction conditions: PET waste (0.2 g), ZPT (4 mg), ethylene glycol (1 g), temperature (185 °C).

**Note 1. Goal and scope of life cycle assessment (LCA).**

In this study, the environmental impact of PET recycling was evaluated using LCA. The pre-treatment processes of PET waste were assumed to be consistent with the established protocols for mechanical recycling. In terms of allocation, our study adopts the “cut-off” rule. This principle delineates the original plastic's lifecycle as distinct and separate from that of the recycled plastic, ensuring an independent evaluation of each lifecycle. These form the basis of our “prospective processes”. The functional unit for this LCA is defined as 1 kg of *r*-BHET in Aspen Plus.

The impact assessment was carried out using the professional software OpenLCA 1.10.3. The assessment methods were IPCC 2021 for GWP and Cumulative Energy Demand for non-renewable energy use (NREU). “Background process” data were sourced from the database ecoinvent V.3.10.

**Table S7.** Goal and scope of LCA.

| <b>Goal</b>                                     |                                                                                                                                                                                                                                                                                                       |
|-------------------------------------------------|-------------------------------------------------------------------------------------------------------------------------------------------------------------------------------------------------------------------------------------------------------------------------------------------------------|
| Reason and scope                                | 1. Focus on human health, resource and ecosystem.<br>2. To assess the global warming potential (GWP) and Non-renewable energy use (NREU) of PET recycling, TPA-based production routes and compare it with published commercial depolymerization protocols in Europe or China (Figure 5 in main text) |
| Audience                                        | Industrial stakeholders, the research community, and the public                                                                                                                                                                                                                                       |
| Application                                     | Provide technical support for polyester plastic carbon emission reduction policies and circular economy                                                                                                                                                                                               |
| Intention to use results in comparative studies | Yes, the results are to be compared and disclosed to the public through this article's publication                                                                                                                                                                                                    |
| <b>Scope</b>                                    |                                                                                                                                                                                                                                                                                                       |
| Product system                                  | The PET waste glycolysis section with the recycled BHET production is based on EU and CN.                                                                                                                                                                                                             |
| Functional unit                                 | 1 kg of recycled BHET.                                                                                                                                                                                                                                                                                |
| System boundary                                 | Cradle-to-factory gate, See Figure S13                                                                                                                                                                                                                                                                |
| Allocation                                      | PET waste cut-off, all environmental effects are allocated to recycled BHET chips.                                                                                                                                                                                                                    |
| Assumptions                                     | (1) The pre-treatment discharge of waste PET is consistent with the mechanical method<br>(2) This system deals with 12, 500 kg waste PET/per hour over 8,000 hours/per year<br>(3) This system is located in Europe or China                                                                          |
| Requirements on data and quality                | Foreground material and energy consumption data were obtained from simulation in Aspen Plus and the background processes were chosen based on Ecoinvent V.3.10 in Open LCA 1.10.3.                                                                                                                    |
| LCIA methodology                                | IPCC 2021 for GWP; Cumulative Energy Demand for NREU;                                                                                                                                                                                                                                                 |
| Impact categories assessed                      | 1. Global Warming Potential (GWP, 100a), kg CO <sub>2</sub> equivalent;<br>2. Non-renewable energy use (NREU), MJ;                                                                                                                                                                                    |
| Limitations                                     | In addition to the above-mentioned assumptions, the following aspects are not assessed: plant construction and equipment maintenance.                                                                                                                                                                 |

**Table S8.** NREU values of each raw material of PET glycolysis used in the Open LCA.

| <b>Process</b>                                     | <b>Value</b> | <b>Unit</b> | <b>Location</b>            |
|----------------------------------------------------|--------------|-------------|----------------------------|
| Zinc pyrithione                                    | 32.1862      | MJ per kg   | Global of the world        |
| Ultrapure water production                         | 0.05960      | MJ per kg   | Europe                     |
|                                                    | 0.07874      |             | Rest of the world          |
| Market for tap water                               | 0.00617      | MJ per kg   | Europe without Switzerland |
|                                                    | 0.01534      |             | Rest of the world          |
| Market for ethylene glycol                         | 53.00610     | MJ per kg   | Global of the world        |
| Market group for electricity, low voltage          | 9.15115      | MJ per kWh  | Europe without Switzerland |
|                                                    | 10.22484     |             | China                      |
| Heat production, natural gas, at boiler modulating | 1.13333      | MJ per MJ   | Europe without Switzerland |
|                                                    | 1.13628      |             | Rest of the world          |
| Transport, freight, lorry >32 metric ton           | 1.49960      | MJ per t*km | Europe                     |
|                                                    | 45.49327     | MJ per kg   | Rest of the world          |

**Table S9.** GWP values of each raw material of PET glycolysis used in the Open LCA.

| <b>Process</b>                                     | <b>Value</b> | <b>Unit</b>                     | <b>Location</b>            |
|----------------------------------------------------|--------------|---------------------------------|----------------------------|
| Zinc pyrithione                                    | 1.7138       | kg CO <sub>2</sub> -eq per kg   | Global of the world        |
| Ultrapure water production                         | 0.00300      | kg CO <sub>2</sub> -eq per kg   | Europe                     |
|                                                    | 0.00606      |                                 | Rest of the world          |
| Market for tap water                               | 0.00034      | kg CO <sub>2</sub> -eq per kg   | Europe without Switzerland |
|                                                    | 0.00106      |                                 | Rest of the world          |
| Market for ethylene glycol                         | 2.01648      | kg CO <sub>2</sub> -eq per kg   | Global of the world        |
| Market group for electricity, low voltage          | 0.41694      | kg CO <sub>2</sub> -eq per kWh  | Europe without Switzerland |
|                                                    | 1.05271      |                                 | China                      |
| Heat production, natural gas, at boiler modulating | 0.06964      | kg CO <sub>2</sub> -eq per MJ   | Europe without Switzerland |
|                                                    | 0.07065      |                                 | Rest of the world          |
| Transport, freight, lorry >32 metric ton           | 0.08599      | kg CO <sub>2</sub> -eq per t*km | Europe                     |
|                                                    | 0.08889      |                                 | Rest of the world          |

**Table S10.** LCA results of case-CN recycling route.

| Country           | Impact category                         | Reference unit           | Mechanical shredding | Depolymerization | Total   |
|-------------------|-----------------------------------------|--------------------------|----------------------|------------------|---------|
| CN                | Fine particulate matter formation       | kg PM2.5 eq              | 0.00035              | 0.00036          | 0.00071 |
|                   | Fossil resource scarcity                | kg oil eq                | 0.09112              | 0.35681          | 0.45791 |
|                   | Freshwater ecotoxicity                  | kg 1,4-DCB               | 0.00808              | 0.00770          | 0.01578 |
|                   | Freshwater eutrophication               | kg P eq                  | 0.00004              | 0.00004          | 0.00008 |
|                   | Global warming                          | kg CO <sub>2</sub> eq    | 0.34624              | 1.09510          | 1.44134 |
|                   | Human carcinogenic toxicity             | kg 1,4-DCB               | 0.01100              | 0.02881          | 0.03980 |
|                   | Human non-carcinogenic toxicity         | kg 1,4-DCB               | 0.12972              | 0.12632          | 0.25604 |
|                   | Ionizing radiation                      | kBq Co-60 eq             | 0.00398              | 0.00691          | 0.01088 |
|                   | Land use                                | m <sup>2</sup> a crop eq | 0.00478              | 0.00206          | 0.00684 |
|                   | Marine ecotoxicity                      | kg 1,4-DCB               | 0.01059              | 0.01019          | 0.02078 |
|                   | Marine eutrophication                   | kg N eq                  | 0.00000              | 0.00000          | 0.00001 |
|                   | Mineral resource scarcity               | kg Cu eq                 | 0.00021              | 0.00058          | 0.00079 |
|                   | Ozone formation, Human health           | kg NO <sub>x</sub> eq    | 0.00065              | 0.00066          | 0.00130 |
|                   | Ozone formation, Terrestrial ecosystems | kg NO <sub>x</sub> eq    | 0.00066              | 0.00070          | 0.00136 |
|                   | Stratospheric ozone depletion           | kg CFC11 eq              | 0.00000              | 0.00000          | 0.00000 |
|                   | Terrestrial acidification               | kg SO <sub>2</sub> eq    | 0.00079              | 0.00088          | 0.00167 |
|                   | Terrestrial ecotoxicity                 | kg 1,4-DCB               | 0.81460              | 0.14433          | 0.95893 |
| Water consumption | m <sup>3</sup>                          | 0.00058                  | 0.01805              | 0.01863          |         |

**Table S11.** LCA results of case-EU recycling route.

| Country | Impact category                         | Reference unit           | Mechanical shredding | Depolymerization | Total   |
|---------|-----------------------------------------|--------------------------|----------------------|------------------|---------|
| EU      | Fine particulate matter formation       | kg PM2.5 eq              | 0.00017              | 0.00026          | 0.00043 |
|         | Fossil resource scarcity                | kg oil eq                | 0.07320              | 0.35811          | 0.43131 |
|         | Freshwater ecotoxicity                  | kg 1,4-DCB               | 0.00862              | 0.00733          | 0.01595 |
|         | Freshwater eutrophication               | kg P eq                  | 0.00008              | 0.00004          | 0.00012 |
|         | Global warming                          | kg CO <sub>2</sub> eq    | 0.22759              | 1.05359          | 1.28118 |
|         | Human carcinogenic toxicity             | kg 1,4-DCB               | 0.00956              | 0.02386          | 0.03342 |
|         | Human non-carcinogenic toxicity         | kg 1,4-DCB               | 0.13406              | 0.11450          | 0.24856 |
|         | Ionizing radiation                      | kBq Co-60 eq             | 0.03759              | 0.01625          | 0.05383 |
|         | Land use                                | m <sup>2</sup> a crop eq | 0.00418              | 0.00178          | 0.00596 |
|         | Marine ecotoxicity                      | kg 1,4-DCB               | 0.01130              | 0.00969          | 0.02098 |
|         | Marine eutrophication                   | kg N eq                  | 0.00001              | 0.00000          | 0.00001 |
|         | Mineral resource scarcity               | kg Cu eq                 | 0.00024              | 0.00051          | 0.00075 |
|         | Ozone formation, Human health           | kg NO <sub>x</sub> eq    | 0.00025              | 0.00054          | 0.00079 |
|         | Ozone formation, Terrestrial ecosystems | kg NO <sub>x</sub> eq    | 0.00026              | 0.00059          | 0.00085 |
|         | Stratospheric ozone depletion           | kg CFC11 eq              | 0.00000              | 0.00000          | 0.00000 |
|         | Terrestrial acidification               | kg SO <sub>2</sub> eq    | 0.00041              | 0.00076          | 0.00117 |
|         | Terrestrial ecotoxicity                 | kg 1,4-DCB               | 0.78489              | 0.11837          | 0.90327 |
|         | Water consumption                       | m <sup>3</sup>           | 0.00132              | 0.01828          | 0.01960 |

**Table S12.** Comparative LCA results of case-CN recycling route and the petroleum-based TPA synthesis route.

| Country | Impact category                         | Reference unit           | petroleum-based<br>TPA synthesis route | r-BHET/TPA<br>route (%) | synthesis |
|---------|-----------------------------------------|--------------------------|----------------------------------------|-------------------------|-----------|
| CN      | Fine particulate matter formation       | kg PM2.5 eq              | 0.00313                                | 22.68371                |           |
|         | Fossil resource scarcity                | kg oil eq                | 1.44837                                | 31.61554                |           |
|         | Freshwater ecotoxicity                  | kg 1,4-DCB               | 0.08746                                | 18.04253                |           |
|         | Freshwater eutrophication               | kg P eq                  | 0.00054                                | 14.81481                |           |
|         | Global warming                          | kg CO <sub>2</sub> eq    | 2.65215                                | 54.3461                 |           |
|         | Human carcinogenic toxicity             | kg 1,4-DCB               | 0.15110                                | 26.34017                |           |
|         | Human non-carcinogenic toxicity         | kg 1,4-DCB               | 1.69936                                | 15.06685                |           |
|         | Ionizing radiation                      | kBq Co-60 eq             | 0.09467                                | 11.49255                |           |
|         | Land use                                | m <sup>2</sup> a crop eq | 0.02886                                | 23.70062                |           |
|         | Marine ecotoxicity                      | kg 1,4-DCB               | 0.11429                                | 18.18182                |           |
|         | Marine eutrophication                   | kg N eq                  | 0.00007                                | 14.28571                |           |
|         | Mineral resource scarcity               | kg Cu eq                 | 0.00866                                | 9.1224                  |           |
|         | Ozone formation, Human health           | kg NO <sub>x</sub> eq    | 0.00539                                | 24.11874                |           |
|         | Ozone formation, Terrestrial ecosystems | kg NO <sub>x</sub> eq    | 0.00568                                | 23.94366                |           |
|         | Stratospheric ozone depletion           | kg CFC11 eq              | 0.00001                                | 0                       |           |
|         | Terrestrial acidification               | kg SO <sub>2</sub> eq    | 0.00686                                | 24.34402                |           |
|         | Terrestrial ecotoxicity                 | kg 1,4-DCB               | 4.73728                                | 20.24221                |           |
|         | Water consumption                       | m <sup>3</sup>           | 0.04499                                | 41.4092                 |           |

**Table S13.** Comparative LCA results of case-EU recycling route and the petroleum-based TPA synthesis route.

| Country | Impact category                         | Reference unit           | petroleum-based<br>TPA synthesis route | r-BHET/TPA<br>route (%) | synthesis |
|---------|-----------------------------------------|--------------------------|----------------------------------------|-------------------------|-----------|
| EU      | Fine particulate matter formation       | kg PM2.5 eq              | 0.00311                                | 13.82637                |           |
|         | Fossil resource scarcity                | kg oil eq                | 1.44615                                | 29.82471                |           |
|         | Freshwater ecotoxicity                  | kg 1,4-DCB               | 0.08716                                | 18.29968                |           |
|         | Freshwater eutrophication               | kg P eq                  | 0.00053                                | 22.64151                |           |
|         | Global warming                          | kg CO <sub>2</sub> eq    | 2.64341                                | 48.46694                |           |
|         | Human carcinogenic toxicity             | kg 1,4-DCB               | 0.14828                                | 22.53844                |           |
|         | Human non-carcinogenic toxicity         | kg 1,4-DCB               | 1.69219                                | 14.68866                |           |
|         | Ionizing radiation                      | kBq Co-60 eq             | 0.09478                                | 56.79468                |           |
|         | Land use                                | m <sup>2</sup> a crop eq | 0.02874                                | 20.73765                |           |
|         | Marine ecotoxicity                      | kg 1,4-DCB               | 0.11388                                | 18.42211                |           |
|         | Marine eutrophication                   | kg N eq                  | 0.00007                                | 14.89971                |           |
|         | Mineral resource scarcity               | kg Cu eq                 | 0.00862                                | 8.7007                  |           |
|         | Ozone formation, Human health           | kg NO <sub>x</sub> eq    | 0.00537                                | 14.71136                |           |
|         | Ozone formation, Terrestrial ecosystems | kg NO <sub>x</sub> eq    | 0.00566                                | 15.01767                |           |
|         | Stratospheric ozone depletion           | kg CFC11 eq              | 0.00001                                | 0                       |           |
|         | Terrestrial acidification               | kg SO <sub>2</sub> eq    | 0.00684                                | 17.10526                |           |
|         | Terrestrial ecotoxicity                 | kg 1,4-DCB               | 4.72598                                | 19.11286                |           |
|         | Water consumption                       | m <sup>3</sup>           | 0.04502                                | 43.53621                |           |

Table S14. Cradle-to-gate LCA results contribution analysis of PET glycolysis, functional unit = 1 kg BHET flakes. In the context of EU.

| Impact category                         | Reference unit           | Electricity | Steam | Transport | Chemicals |
|-----------------------------------------|--------------------------|-------------|-------|-----------|-----------|
| Fine particulate matter formation       | kg PM2.5 eq              | 28.46       | 62.03 | 6.72      | 2.79      |
| Fossil resource scarcity                | kg oil eq                | 4.99        | 91.31 | 2.39      | 1.32      |
| Freshwater ecotoxicity                  | kg 1,4-DCB               | 52.29       | 42.82 | 2.87      | 2.02      |
| Freshwater eutrophication               | kg P eq                  | 67.94       | 26.93 | 1.61      | 3.52      |
| Global warming                          | kg CO <sub>2</sub> eq    | 6.27        | 90.16 | 2.16      | 1.40      |
| Human carcinogenic toxicity             | kg 1,4-DCB               | 19.53       | 61.43 | 4.43      | 14.61     |
| Human non-carcinogenic toxicity         | kg 1,4-DCB               | 47.19       | 42.44 | 7.33      | 3.04      |
| Ionizing radiation                      | kBq Co-60 eq             | 74.63       | 20.92 | 1.24      | 3.21      |
| Land use                                | m <sup>2</sup> a crop eq | 34.32       | 26.36 | 36.76     | 2.57      |
| Marine ecotoxicity                      | kg 1,4-DCB               | 49.99       | 43.23 | 4.66      | 2.12      |
| Marine eutrophication                   | kg N eq                  | 54.96       | 39.12 | 1.82      | 4.10      |
| Mineral resource scarcity               | kg Cu eq                 | 21.23       | 63.34 | 5.67      | 9.76      |
| Ozone formation, Human health           | kg NO <sub>x</sub> eq    | 18.71       | 71.90 | 6.97      | 2.42      |
| Ozone formation, Terrestrial ecosystems | kg NO <sub>x</sub> eq    | 17.69       | 73.01 | 6.92      | 2.38      |
| Stratospheric ozone depletion           | kg CFC11 eq              | 12.52       | 79.14 | 6.72      | 1.62      |
| Terrestrial acidification               | kg SO <sub>2</sub> eq    | 25.80       | 66.94 | 4.82      | 2.44      |
| Terrestrial ecotoxicity                 | kg 1,4-DCB               | 9.46        | 11.78 | 77.33     | 1.42      |
| Water consumption                       | m <sup>3</sup>           | 6.92        | 2.87  | 0.27      | 89.94     |

Table S15. Cradle-to-gate LCA results contribution analysis of PET glycolysis, functional unit = 1 kg BHET flakes. In the context of CN.

| Impact category                         | Reference unit           | Electricity | Steam | Transport | Chemicals |
|-----------------------------------------|--------------------------|-------------|-------|-----------|-----------|
| Fine particulate matter formation       | kg PM2.5 eq              | 44.63       | 44.54 | 4.33      | 6.50      |
| Fossil resource scarcity                | kg oil eq                | 8.85        | 86.81 | 2.29      | 2.05      |
| Freshwater ecotoxicity                  | kg 1,4-DCB               | 48.48       | 42.83 | 3.01      | 5.69      |
| Freshwater eutrophication               | kg P eq                  | 48.60       | 35.64 | 2.78      | 12.98     |
| Global warming                          | kg CO <sub>2</sub> eq    | 14.47       | 81.31 | 1.99      | 2.23      |
| Human carcinogenic toxicity             | kg 1,4-DCB               | 20.10       | 51.98 | 3.82      | 24.10     |
| Human non-carcinogenic toxicity         | kg 1,4-DCB               | 43.10       | 41.54 | 7.40      | 7.96      |
| Ionizing radiation                      | kBq Co-60 eq             | 29.86       | 43.46 | 4.91      | 21.76     |
| Land use                                | m <sup>2</sup> a crop eq | 39.10       | 23.14 | 32.16     | 5.60      |
| Marine ecotoxicity                      | kg 1,4-DCB               | 46.11       | 43.24 | 4.82      | 5.84      |
| Marine eutrophication                   | kg N eq                  | 32.76       | 50.21 | 2.76      | 14.28     |
| Mineral resource scarcity               | kg Cu eq                 | 15.92       | 59.21 | 5.59      | 19.28     |
| Ozone formation, Human health           | kg NO <sub>x</sub> eq    | 44.51       | 47.20 | 4.46      | 3.84      |
| Ozone formation, Terrestrial ecosystems | kg NO <sub>x</sub> eq    | 42.81       | 48.87 | 4.53      | 3.80      |
| Stratospheric ozone depletion           | kg CFC11 eq              | 13.46       | 74.37 | 6.30      | 5.87      |
| Terrestrial acidification               | kg SO <sub>2</sub> eq    | 42.41       | 49.64 | 3.60      | 4.35      |
| Terrestrial ecotoxicity                 | kg 1,4-DCB               | 11.84       | 11.65 | 72.86     | 3.65      |
| Water consumption                       | m <sup>3</sup>           | 2.82        | 2.51  | 0.30      | 94.36     |

**Table S16.** LCA results in glycolysis of post-consumer PET textiles, functional unit = 1 kg recycled BHET.

| Section              | China    |         | Europe   |         |
|----------------------|----------|---------|----------|---------|
|                      | NREU     | GWP     | NREU     | GWP     |
| Mechanical shredding | 4.2589   | 0.34624 | 4.04499  | 0.22759 |
| PET glycolysis       | 16.85866 | 1.05840 | 16.63373 | 1.01844 |
| Total                | 21.11756 | 1.40464 | 20.67872 | 1.24603 |

Units: NREU: MJ/kg recycled BHET; GWP: kg CO<sub>2</sub>-eq/kg recycled BHET.

**Table S17.** LCA results in TPA route to produce BHET (TPA synthesis route), functional unit = 1 kg the petroleum-based TPA synthesis route.

| Section     | China    |         | Europe   |         |
|-------------|----------|---------|----------|---------|
|             | NREU     | GWP     | NREU     | GWP     |
| Virgin BHET | 69.26206 | 2.54919 | 69.16224 | 2.54065 |

Units: NREU: MJ/kg virgin BHET; GWP: kg CO<sub>2</sub>-eq/kg virgin BHET.

**Table S18.** Material and energy input-output of collection, transport, and pretreatment of waste polyester textile, functional unit = 1 kg BHET flakes.

| Items                                   | Quantity | Unit |
|-----------------------------------------|----------|------|
| <b>Input:</b>                           |          |      |
| Waste transparent PET textiles          | 1088     | kg   |
| Transportation distance                 | 400      | km   |
| Electricity, low voltage                | 229.84   | kWh  |
| Heat (from natural gas)                 | 2066.87  | MJ   |
| <b>Output:</b>                          |          |      |
| By-products (e.g., bottle caps, labels) | 88       | kg   |
| PET flakes                              | 1000     | kg   |

The feedstock considered in this study refers to polyester-rich textiles, with a contaminant content of approximately 8%.

**Table S19.** Mass balance of post-consumer PET textiles glycolysis.

| <b>Para.</b>            | <b>CAT1</b> | <b>EG</b> | <b>FEED</b> | <b>H-EG1</b> | <b>H-EG2</b> | <b>H-L2</b> | <b>L2</b> | <b>L3</b> |
|-------------------------|-------------|-----------|-------------|--------------|--------------|-------------|-----------|-----------|
| <b>Temp./°C</b>         | 25.00       | 180.00    | 179.72      | 197.66       | 110.00       | 196.00      | 180.00    | 99.87     |
| <b>Press/kPa</b>        | 101.33      | 101.33    | 101.33      | 101.33       | 0.01         | 101.33      | 101.33    | 101.33    |
| <b>Mass flow (kg/h)</b> | 125.00      | 50000.00  | 63090.45    | 46918.56     | 46918.56     | 63090.45    | 63090.45  | 93028.91  |
| <b>W-PET (kg/h)</b>     | 0.00        | 0.00      | 12500.51    | 0.00         | 0.00         | 0.51        | 0.51      | 0.51      |
| <b>Water (kg/h)</b>     | 0.00        | 0.00      | 0.00        | 0.00         | 0.00         | 0.00        | 0.00      | 76857.00  |
| <b>EG (kg/h)</b>        | 0.00        | 50000.00  | 50000.00    | 46129.15     | 46129.15     | 46139.93    | 46139.93  | 10.78     |
| <b>BHET (kg/h)</b>      | 0.00        | 0.00      | 0.00        | 76.86        | 76.86        | 15448.26    | 15448.26  | 15371.42  |
| <b>CAT1 (kg/h)</b>      | 125.00      | 0.00      | 125.00      | 0.00         | 0.00         | 125.00      | 125.00    | 125.00    |
| <b>OLI-PET (kg/h)</b>   | 0.00        | 0.00      | 464.94      | 712.55       | 712.55       | 1376.76     | 1376.76   | 664.20    |

CAT1: zinc pyrithione

**Table S19.** Mass balance of post-consumer PET textiles glycolysis (continued).

| <b>Para.</b>            | <b>L4</b> | <b>L5</b> | <b>L6</b> | <b>L7</b> | <b>L-EG</b> | <b>OLIGOMER</b> | <b>PRODUCT</b> | <b>R-BHET</b> |
|-------------------------|-----------|-----------|-----------|-----------|-------------|-----------------|----------------|---------------|
| <b>Temp./°C</b>         | 99.87     | 100.00    | 25.00     | 4.00      | 197.54      | 99.87           | 110.00         | 4.00          |
| <b>Press/kPa</b>        | 101.33    | 88.50     | 101.33    | 101.33    | 101.33      | 101.33          | 0.01           | 101.33        |
| <b>Mass flow (kg/h)</b> | 92563.46  | 23374.90  | 23374.90  | 23374.90  | 46918.56    | 465.45          | 16171.91       | 15570.67      |
| <b>W-PET (kg/h)</b>     | 0.00      | 0.00      | 0.00      | 0.00      | 0.00        | 0.51            | 0.51           | 0.00          |
| <b>Water (kg/h)</b>     | 76857.00  | 7670.19   | 7670.19   | 7670.19   | 0.00        | 0.00            | 0.00           | 0.00          |
| <b>EG (kg/h)</b>        | 10.78     | 9.04      | 9.04      | 9.04      | 46129.15    | 0.00            | 10.78          | 0.00          |
| <b>BHET (kg/h)</b>      | 15371.42  | 15371.41  | 15371.41  | 15371.41  | 76.86       | 0.00            | 15371.42       | 15371.41      |
| <b>CAT1 (kg/h)</b>      | 125.00    | 125.00    | 125.00    | 125.00    | 0.00        | 0.00            | 125.00         | 0.00          |
| <b>OLI-PET (kg/h)</b>   | 199.26    | 199.25    | 199.25    | 199.25    | 712.55      | 464.94          | 664.20         | 199.25        |

CAT1: zinc pyrithione

**Table S19.** Mass balance of post-consumer PET textiles glycolysis (continued).

| <b>Para.</b>            | <b>R-EG</b> | <b>R-WATER</b> | <b>R-WATER1</b> | <b>R-WATER2</b> | <b>W-PET</b> | <b>WATER</b> |
|-------------------------|-------------|----------------|-----------------|-----------------|--------------|--------------|
| <b>Temp./°C</b>         | 197.54      | 100.03         | 100.00          | 4.00            | 25.00        | 99.00        |
| <b>Press/kPa</b>        | 101.33      | 101.33         | 88.50           | 101.33          | 101.33       | 101.33       |
| <b>Mass flow (kg/h)</b> | 46918.56    | 76992.79       | 69188.56        | 7804.23         | 12500.00     | 76857.00     |
| <b>W-PET (kg/h)</b>     | 0.00        | 0.00           | 0.00            | 0.00            | 12500.00     | 0.00         |
| <b>Water (kg/h)</b>     | 0.00        | 76857.00       | 69186.81        | 7670.19         | 0.00         | 76857.00     |
| <b>EG (kg/h)</b>        | 46129.15    | 10.78          | 1.74            | 9.04            | 0.00         | 0.00         |
| <b>BHET (kg/h)</b>      | 76.86       | 0.00           | 0.00            | 0.00            | 0.00         | 0.00         |
| <b>CAT1 (kg/h)</b>      | 0.00        | 125.00         | 0.00            | 125.00          | 0.00         | 0.00         |
| <b>OLI-PET (kg/h)</b>   | 712.55      | 0.01           | 0.01            | 0.00            | 0.00         | 0.00         |

CAT1: zinc pyrithione

**Table S20.** Mass balance of petroleum-based TPA synthesis route.

| <b>Para.</b>        | <b>BHET</b> | <b>CAT</b> | <b>EG</b> | <b>MIXTURE1</b> | <b>MIXTURE2</b> | <b>MIXTURE3</b> |
|---------------------|-------------|------------|-----------|-----------------|-----------------|-----------------|
| <b>Temp./°C</b>     | 195.00      | 25.00      | 25.00     | 25.00           | 195.00          | 130.80          |
| <b>Press/kPa</b>    | 8.11        | 101.33     | 101.33    | 101.33          | 111.46          | 101.33          |
| <b>Water (kg/h)</b> | 4.83        | 0.00       | 0.00      | 0.00            | 2196.93         | 870.00          |
| <b>EG (kg/h)</b>    | 104.26      | 0.00       | 9080.17   | 9080.17         | 1511.05         | 1435.24         |
| <b>CAT2 (kg/h)</b>  | 3.04        | 3.04       | 0.00      | 3.04            | 3.04            | 3.04            |
| <b>BHET (kg/h)</b>  | 15480.96    | 0.00       | 0.00      | 0.00            | 15501.99        | 15501.99        |
| <b>TPA (kg/h)</b>   | 0.00        | 0.00       | 0.00      | 10129.80        | 0.00            | 0.00            |

CAT2: Co(OAc)<sub>2</sub>.

**Table S20.** Mass balance of petroleum-based TPA synthesis route (continued).

| <b>Para.</b>        | <b>R-EG</b> | <b>R-H2O</b> | <b>TPA</b> | <b>VAP1</b> | <b>VAP2</b> | <b>VAP3</b> |
|---------------------|-------------|--------------|------------|-------------|-------------|-------------|
| <b>Temp./°C</b>     | 177.45      | 100.02       | 25.00      | 130.80      | 195.00      | 171.80      |
| <b>Press/kPa</b>    | 101.33      | 101.33       | 101.33     | 101.33      | 8.11        | 101.33      |
| <b>Water (kg/h)</b> | 23.74       | 2168.36      | 0.00       | 1326.92     | 865.17      | 2192.10     |
| <b>EG (kg/h)</b>    | 1406.80     | 0.00         | 0.00       | 75.81       | 1330.99     | 1406.80     |
| <b>CAT2 (kg/h)</b>  | 0.00        | 0.00         | 0.00       | 0.00        | 0.00        | 0.00        |
| <b>BHET (kg/h)</b>  | 21.03       | 0.00         | 0.00       | 0.00        | 21.03       | 21.03       |
| <b>TPA (kg/h)</b>   | 23.74       | 2168.36      | 0.00       | 1326.92     | 865.17      | 2192.10     |

CAT2: Co(OAc)<sub>2</sub>.

**Table S21.** Details of the utilities with post-consumer PET textiles glycolysis and petroleum-based TPA synthesis route.

| Unit processes used | Type of utility used  | Initial and final state of utility |                                 |
|---------------------|-----------------------|------------------------------------|---------------------------------|
|                     |                       | Initial                            | Final                           |
| <b>COOLING</b>      | Water                 | 20°C; 1.00 atm; liquid phase       | 24°C; 1.00 atm; liquid phase    |
| <b>L-STEAM</b>      | Low-pressure steam    | 125°C; 2.29 atm; gaseous phase     | 124°C; 2.22 atm; gaseous phase  |
| <b>M-STEAM</b>      | Medium-pressure steam | 190°C; 8.86 atm; gaseous phase     | 189°C; 8.65 atm; gaseous phase  |
| <b>H-STEAM</b>      | High-pressure steam   | 250°C; 84.80 atm; gaseous phase    | 249°C; 83.67 atm; gaseous phase |
| <b>ELECT</b>        | Electricity           |                                    |                                 |

**Table S22.** Utility of post-consumer PET textiles glycolysis.

| <b>Unit processes used</b> | <b>Type of utility used</b> | <b>Quantity</b> | <b>Function</b> |
|----------------------------|-----------------------------|-----------------|-----------------|
| <b>RCSTR1</b>              | High pressure steam         | 741.03 kg/h     | Heating         |
| <b>FLASH1</b>              | High pressure steam         | 17917.49 kg/h   | Heating         |
| <b>FLASH2</b>              | Low pressure steam          | 71336.96 kg/h   | Heating         |
| <b>COOLER1</b>             | Water                       | 269410.68 kg/h  | Cooling         |
| <b>COOLER2</b>             | Electricity                 | 330.32 kWh      | Cooling         |

**Table S23.** Utility of virgin BHET route.

| <b>Unit processes used</b> | <b>Type of utility used</b> | <b>Quantity</b> | <b>Function</b>       |
|----------------------------|-----------------------------|-----------------|-----------------------|
| <b>RCSTR1</b>              | High pressure steam         | 2676.44 kg/h    | Heating               |
| <b>FLASH2</b>              | High pressure steam         | 3146.16 kg/h    | Heating               |
| <b>RADFRAC1</b>            | Water                       | 163921 kg/h     | Cool the top fraction |
|                            | High pressure steam         | 1075.2 kg/h     | Heat the tower kettle |

**Table S24.** Energy balance of post-consumer PET textiles glycolysis.

| <b>Equipment</b>   | <b>RCSTR1</b> | <b>FLASH1</b> | <b>COOLER1</b> | <b>COOLER2</b> | <b>FLASH2</b> |
|--------------------|---------------|---------------|----------------|----------------|---------------|
| <b>Cost (MJ/h)</b> | 1274.07       | 30806.00      | -4499.59       | -1189.15       | 156362.00     |

**Table S25.** Energy balance of virgin BHET route.

| <b>Equipment</b>   | <b>RCSTR1</b> | <b>FLASH2</b> | <b>RADFRAC1</b>  |                 |
|--------------------|---------------|---------------|------------------|-----------------|
|                    |               |               | <b>Condenser</b> | <b>Reboiler</b> |
| <b>Cost (MJ/h)</b> | 4601.67       | 5409.27       | -3421.97         | 1848.61         |

## **Note 2. Techno-economic analysis (TEA) analysis**

To investigate the economic feasibility of this process for PET recycling, we carried out a techno-economic analysis using a model adapted from that of Aspen simulation. The processing capacity of the plant is 100,000 tons of waste PET per year. Table S24 summarize the model used to calculate the plant-gate levelized cost of processing PET. All economic results are reported on a 2025 cost basis. The prices of input chemicals and products are listed in the Tables S25-36.

### **List of assumptions made for the calculations:**

1. The capacity factor is expected to be operational on any given day and is assumed to be 0.9, which means the plant will be operational 21.9 hours per day.
2. In the depolymerization stage of waste PET, input chemicals include PET, catalyst, EG, and water. The output products include *r*-BHET and EG.
3. The capital costs of glycolysis and distillation equipment are dependent on the recycling of PET.
4. The catalyst is derived directly from the fabric, and it's extremely low loading, coupled with the fact that no recovery process is required, renders the associated cost virtually negligible.
5. Both operation and maintenance costs are based on actual usage and unit price.
6. Utility cost is based on the unit price of public works simulated by aspen software.
- 7 Transportation cost is based on shipping distance and price.
8. The clean PET flakes could be obtained at \$0.66/kg based on the average mixed bale PET cost in recent years. The price of PET waste (\$0.39/kg) was assumed to be 40% of virgin PET. (<https://jiage.molbase.cn/hangqing/PET>). The PET waste textiles could be obtained at \$0.13/kg (<https://www.chinacace.org/news/view?id=14859>).

**Table S26.** Total equipment cost of PET recycling.

| <b>Items</b>   | <b>Equipment Cost [\$]</b> |
|----------------|----------------------------|
| <b>Grinder</b> | 8000                       |
| <b>COOLER2</b> | 22300                      |
| <b>HEATX1</b>  | 30500                      |
| <b>FLASH1</b>  | 1404200                    |
| <b>FLASH2</b>  | 44400                      |
| <b>2-Sep</b>   | 19100                      |
| <b>RCSTR1</b>  | 520500                     |
| <b>COOLER1</b> | 22300                      |
| <b>1-Sep</b>   | 31200                      |
| <b>Total</b>   | 2102500                    |

**Table S27.** Total equipment cost of petroleum-based TPA synthesis route.

| <b>Items</b>    | <b>Equipment Cost [\$]</b> |
|-----------------|----------------------------|
| <b>RCSTR1</b>   | 535400                     |
| <b>RADFRAC1</b> | 172300                     |
| <b>FLASH2</b>   | 20100                      |
| <b>FLASH1</b>   | 20100                      |
| <b>Total</b>    | 747900                     |

**Table S28.** Total direct cost, total indirect cost, and total capital investment cost of clean PET, PET wastes, and textile waste recycling.

| Items                                 | Notes                                                                     | Value [\$]        |
|---------------------------------------|---------------------------------------------------------------------------|-------------------|
| Equipment cost                        | The cost of equipment                                                     | 2,102,500         |
| Equipment installation                | 0.47 * Equipment cost                                                     | 988,175           |
| Instrumentation and control           | 0.36 * Equipment cost                                                     | 756,900           |
| Piping                                | 0.68 * Equipment cost                                                     | 1,429,700         |
| Electrical/heating installation       | 0.19 * Equipment cost                                                     | 399,475           |
| Utility                               | Buildings construction + Site development + Service facilities + Delivery | 1,892,250         |
| <b>Total Direct cost (TDC)</b>        | <b>Sum of above items</b>                                                 | <b>7,569,000</b>  |
| Engineering and supervision           | 0.10 * TDC                                                                | 756,900           |
| Construction fee                      | 0.10 * TDC                                                                | 756,900           |
| Legal expenses                        | 0.03 * TDC                                                                | 227,070           |
| Project Contingency                   | 0.10 * TDC                                                                | 75,690            |
| Construction labor cost               | 0.15 * TDC                                                                | 1,135,350         |
| Other Cost (Start-Up, Permits)        | 0.10 * TDC                                                                | 756,900           |
| <b>Total Indirect Cost (TIC)</b>      | <b>Sum of above items</b>                                                 | <b>3,708,810</b>  |
| Fixed Capital Investment (FCI)        | TDC+TIC                                                                   | 11,277,810        |
| Land                                  | 0.10 * FCI                                                                | 1,127,781         |
| Working Capital                       | 0.05 * FCI                                                                | 563,891           |
| <b>Total Capital Investment (TCI)</b> | <b>FCI + Land + Working capital</b>                                       | <b>12,969,482</b> |

**Table S29.** Variable operating cost, fix operating cost, general expenses and total raw materials of clean PET, PET wastes, and textile waste recycling.

| Items                                             | Notes                                                   | Value [\$]        |                   |                   |
|---------------------------------------------------|---------------------------------------------------------|-------------------|-------------------|-------------------|
| Operating labor                                   | Operating hours *<br>hourly wage * workers              | 900,000           |                   |                   |
| Operating supervision                             | 0.15 * Operating labor                                  | 135,000           |                   |                   |
| Maintenance and repair                            | 0.06 * FCI                                              | 676,669           |                   |                   |
| Operating supplies                                | 0.15 * Maintenance and repair                           | 101,500           |                   |                   |
| Laboratory charges                                | 0.15 * Operating labor                                  | 20,250            |                   |                   |
| Royalties                                         | 0.03 * Total product cost                               | 2,517,163         | 1,679,781         | 780,370           |
| <b>Variable operating cost</b>                    | <b>Sum of above items</b>                               | <b>4,350,582</b>  | <b>3,513,200</b>  | <b>2,613,789</b>  |
| Property tax                                      | 0.02 * FCI                                              | 225,556           |                   |                   |
| Insurance                                         | 0.01 * FCI                                              | 112,778           |                   |                   |
| Rent                                              | 0.08 * FCI                                              | 902,225           |                   |                   |
| Depreciation                                      | 0.20 * FCI                                              | 2,255,562         |                   |                   |
| <b>Fix operating cost</b>                         | <b>Sum of above items</b>                               | <b>3,496,121</b>  |                   |                   |
| Administration                                    | 0.20 * Operating labor                                  | 180,000           |                   |                   |
| Distribution and selling Research and development | 0.05 * (Variable operating costs + Fix operating costs) | 392,335           | 350,466           | 305,496           |
| Research and development                          | 0.04 * (Variable operating costs + Fix operating costs) | 313,868           | 280,373           | 244,396           |
| <b>General expenses</b>                           | <b>Sum of above items</b>                               | <b>886,203</b>    | <b>810,839</b>    | <b>729,892</b>    |
| Raw materials                                     | Clean PET, PET waste, textile waste                     | 66,000,000        | 39,000,000        | 10,000,000        |
| Chemicals                                         | Zinc pyridyl thione                                     |                   | 185,714           |                   |
| Tap water                                         | For cooling                                             |                   | 926,940           |                   |
| Steam                                             | As an energy carrier, for heating                       |                   | 3,733,386         |                   |
| Electricity                                       | For all the process using electricity                   |                   | 1,766,500         |                   |
| Transportation                                    | For transporting waste raw materials                    |                   | 2,560,000         |                   |
| <b>Total raw materials</b>                        | <b>Sum of above items</b>                               | <b>75,172,540</b> | <b>48,172,540</b> | <b>19,172,540</b> |

**Table S30.** Total direct cost, total indirect cost, and total capital investment cost of TPA route to produce BHET.

| Items                                 | Notes                                                                     | Value [\$]       |
|---------------------------------------|---------------------------------------------------------------------------|------------------|
| Equipment cost                        | The cost of equipment                                                     | 747,900          |
| Equipment installation                | 0.47 * Equipment cost                                                     | 351,513          |
| Instrumentation and control           | 0.36 * Equipment cost                                                     | 269,244          |
| Piping                                | 0.68 * Equipment cost                                                     | 508,572          |
| Electrical/heating installation       | 0.19 * Equipment cost                                                     | 142,101          |
| Utility                               | Buildings construction + Site development + Service facilities + Delivery | 673,110          |
| <b>Total Direct cost (TDC)</b>        | <b>Sum of above items</b>                                                 | <b>2,692,440</b> |
| Engineering and supervision           | 0.10 * TDC                                                                | 269,244          |
| Construction fee                      | 0.10 * TDC                                                                | 269,244          |
| Legal expenses                        | 0.03 * TDC                                                                | 80,773           |
| Project Contingency                   | 0.10 * TDC                                                                | 26,924           |
| Construction labor cost               | 0.15 * TDC                                                                | 403,866          |
| Other Cost (Start-Up, Permits)        | 0.10 * TDC                                                                | 269,244          |
| <b>Total Indirect Cost (TIC)</b>      | <b>Sum of above items</b>                                                 | <b>1,319,296</b> |
| Fixed Capital Investment (FCI)        | TDC+TIC                                                                   | 4,011,736        |
| Land                                  | 0.10 * FCI                                                                | 401,174          |
| Working Capital                       | 0.05 * FCI                                                                | 200,587          |
| <b>Total Capital Investment (TCI)</b> | <b>FCI + Land + Working capital</b>                                       | <b>4,613,496</b> |

**Table S31.** Variable operating cost, fix operating cost, general expenses of TPA route to produce BHET.

| Items                                                | Notes                                                   | Value [\$]         |
|------------------------------------------------------|---------------------------------------------------------|--------------------|
| Operating labor                                      | Operating hours * hourly wage * workers                 | 900,000            |
| Operating supervision                                | 0.15 * Operating labor                                  | 135,000            |
| Maintenance and repair                               | 0.06 * FCI                                              | 240,704            |
| Operating supplies                                   | 0.15 * Maintenance and repair                           | 36,106             |
| Laboratory charges                                   | 0.15 * Operating labor                                  | 20,250             |
| Royalties                                            | 0.03 * Total product cost                               | 2,605,863          |
| <b>Variable operating cost</b>                       | <b>Sum of above items</b>                               | <b>3,937,923</b>   |
| Property tax                                         | 0.02 * FCI                                              | 80,235             |
| Insurance                                            | 0.01 * FCI                                              | 40,117             |
| Rent                                                 | 0.08 * FCI                                              | 320,939            |
| Depreciation                                         | 0.20 * FCI                                              | 802,347            |
| <b>Fix operating cost</b>                            | <b>Sum of above items</b>                               | <b>1,243,638</b>   |
| Administration                                       | 0.20 * Operating labor                                  | 180,000            |
| Distribution and selling<br>Research and development | 0.05 * (Variable operating costs + Fix operating costs) | 259,078            |
| Research and development                             | 0.04 * (Variable operating costs + Fix operating costs) | 207,262            |
| <b>General expenses</b>                              | <b>Sum of above items</b>                               | <b>646,340</b>     |
| Chemicals                                            | TPA, EG, catalyst                                       | 171,164,619        |
| Tap water                                            | For cooling                                             | 563,888            |
| Steam                                                | As an energy carrier, for heating                       | 208,728            |
| <b>Total raw materials</b>                           | <b>Sum of above items</b>                               | <b>171,937,235</b> |

**Table S32.** Total direct cost, total indirect cost, land, working capital and total capital investment cost of PET waste recycling.

---

| <b>Items</b>                   | <b>Value (Million \$)</b> |
|--------------------------------|---------------------------|
| Total Direct cost (TDC)        | 7.57                      |
| Total Indirect Cost (TIC)      | 3.71                      |
| Land                           | 1.13                      |
| Working Capital                | 0.56                      |
| Total Capital Investment (TCI) | 12.97                     |

---

**Table S33.** Total direct cost, total indirect cost, land, working capital and total capital investment cost of TPA route to produce BHET.

---

| <b>Items</b>                   | <b>Value (Million \$)</b> |
|--------------------------------|---------------------------|
| Total Direct cost (TDC)        | 2.69                      |
| Total Indirect Cost (TIC)      | 1.32                      |
| Land                           | 0.40                      |
| Working Capital                | 0.20                      |
| Total Capital Investment (TCI) | 4.61                      |

---

**Table S34.** Utility operation cost of clean PET recycling.

| <b>Items</b>            | <b>Value (\$/year)</b> | <b>Yield (t/year)</b> | <b>Unit production cost (\$/t)</b> |
|-------------------------|------------------------|-----------------------|------------------------------------|
| Variable operating cost | 4350582                |                       | 35.38                              |
| Fix operating cost      | 3496121                |                       | 28.43                              |
| General expenses        | 886203                 | 122971                | 7.21                               |
| Total raw materials     | 75172540               |                       | 611.31                             |
| Total production cost   | 83905447               |                       | 682.32                             |

**Table S35.** Utility operation cost of PET waste recycling.

| <b>Items</b>            | <b>Value (\$/year)</b> | <b>Yield (t/year)</b> | <b>Unit production cost (\$/t)</b> |
|-------------------------|------------------------|-----------------------|------------------------------------|
| Variable operating cost | 3513200                |                       | 28.57                              |
| Fix operating cost      | 3496121                |                       | 28.43                              |
| General expenses        | 810839                 | 122971                | 6.59                               |
| Total raw materials     | 48172540               |                       | 391.74                             |
| Total production cost   | 55992700               |                       | 455.33                             |

**Table S36.** Utility operation cost of textile waste recycling.

| <b>Items</b>            | <b>Value (\$/year)</b> | <b>Yield (t/year)</b> | <b>Unit production cost (\$/t)</b> |
|-------------------------|------------------------|-----------------------|------------------------------------|
| Variable operating cost | 2613789                |                       | 21.26                              |
| Fix operating cost      | 3496121                |                       | 28.43                              |
| General expenses        | 729892                 | 122971                | 5.94                               |
| Total raw materials     | 19172540               |                       | 155.91                             |
| Total production cost   | 26012342               |                       | 211.53                             |

**Table S37.** Utility operation cost of TPA route to produce BHET.

| <b>Items</b>            | <b>Value (\$/year)</b> | <b>Yield (t/year)</b> | <b>Unit production cost (\$/t)</b> |
|-------------------------|------------------------|-----------------------|------------------------------------|
| Variable operating cost | 3,937,923              |                       | 31.8                               |
| Fix operating cost      | 1,243,638              |                       | 10.0                               |
| General expenses        | 646,340                | 123,848               | 5.2                                |
| Total raw materials     | 171,937,235            |                       | 1388.3                             |
| Total production cost   | 177,765,137            |                       | 1435.3                             |

**Table S38.** MSP of PET recycling, TPA route to produce BHET, and literature.

| Items                                                         | Value (\$/t)           |
|---------------------------------------------------------------|------------------------|
|                                                               | 682.32 (clean PET)     |
| PET recycling                                                 | 455.33 (PET waste)     |
|                                                               | 211.53 (textile waste) |
| TPA route to produce BHET                                     | 1435.3                 |
| ZnO-MW <sup>15</sup>                                          | 1495.7                 |
| GB-richCeO <sub>2</sub> <sup>32</sup>                         | 1290                   |
| Cu <sub>1</sub> Ru <sub>1</sub> superstructures <sup>33</sup> | 1020                   |
| CoMn <sub>2</sub> O <sub>4</sub> <sup>34</sup>                | 1312                   |
| Spent LiCoO <sub>2</sub> <sup>35</sup>                        | 1679                   |

## References

1. Z. Wang, Y. Jin, Y. Wang, Z. Tang, S. Wang, G. Xiao, H. Su, *ACS Sustainable Chem. Eng.* 2022, **10**, 7965–7973.
2. Q. Wang, Y. Geng, X. Lu, S. Zhang, *ACS Sustainable Chem. Eng.* 2015, **3**, 340–348.
3. Q. Wang, X. Lu, X. Zhou, M. Zhu, H. He, X. Zhang, *J. Appl. Polym. Sci.* 2013, **129**, 3574–3581.
4. Y. Wu, X. Tang, S. Qian, H. Huang, Y. Che, Q. Hu, M. Sun, Y. Cheng, Z. Niu, *AIChE J.* 2025, **71**, e70064.
5. N. Han, K. Lee, J. Lee, J. H. Jo, E. J. An, G. Lee, W. S. Chi, C. Lee, *Chemosphere* 2024, **364**, 143187.
6. F. R. Veregue, C. T. Pereira da Silva, M. P. Moises, J. G. Meneguim, M. R. Guilherme, P. A. Arroyo, S. L. Favaro, E. Radovanovic, E. M. Giroto, A. W. Rinaldi, *ACS Sustainable Chem. Eng.* 2018, **6**, 12017–12024.
7. T. Yang, Q. Fan, H. He, C. Gao, Z. Yang, J. Xu, *Chem. Eng. J.* 2025, 163038.
8. P. Sinha, S. Paul, S. Maity, S. Banerjee, *Environ. Sci. Technol.* 2025, **59**, 15766–15776.
9. Y. Wang, T. Wang, L. Zhou, P. Zhang, Z. Wang, X. Chen, *Eur. Polym. J.* 2023, **201**, 112578.
10. Y. Yang, S. Sharma, C. Di Bernardo, E. Rossi, R. Lima, F. S. Kamounah, M. Poderyte, K. Enemark-Rasmussen, G. Ciancaleoni, J.-W. Lee, *ACS Sustainable Chem. Eng.* 2023, **11**, 11294–11304.
11. C. Jehanno, I. Flores, A. P. Dove, A. J. Müller, F. Ruipérez, H. Sardon, *Green Chem.* 2018, **20**, 1205–1212.
12. J. Cao, W. Chen, W. Jiang, X. Li, P. Sun, S. Fu, Q. Zhang, *Angew. Chem. Int. Ed.* 2025, **137**, e202504743.
13. F. Li, X. Yao, R. Ding, Y. Bao, Q. Zhou, D. Yan, Y. Li, J. Xu, J. Xin, X. Lu, *Green Chem.* 2024, **26**, 9802–9813.
14. L.-X. Yun, Y. Wei, Q. Sun, Y.-T. Li, B. Zhang, H.-T. Zhang, Z.-G. Shen, J.-X. Wang, *Green Chem.* 2023, **25**, 6901–6913.
15. Y. Liu, P. Yan, X. Li, Q. Li, S. Li, H. Han, M. Chu, J. Fu, M. Cao, P. Xu, *Adv. Mater.* 2025, **37**, 2412740.
16. Q. Yue, C. Wang, L. Zhang, Y. Ni, Y. Jin, *Polym. Degrad. Stab.* 2011, **96**, 399–403.
17. T. Wang, X. Gong, C. Shen, G. Yu, X. Chen, *Polym. Degrad. Stab.* 2021, **190**, 109601.
18. Y. Jo, E. J. Kim, J. Kim, K. An, *Green Chem.* 2023, **25**, 8160–8171.
19. J. Huang, D. Yan, Q. Zhu, X. Cheng, J. Tang, X. Lu, J. Xin, *Polym. Degrad. Stab.* 2023, **208**, 110245.
20. E. Andini, P. Bhalode, E. Gantert, S. Sadula, D. G. Vlachos, *Sci. Adv.* 2024, **10**, eado6827.
21. Q. Sun, Y.-Y. Zheng, L.-X. Yun, H. Wu, R.-K. Liu, J.-T. Du, Y.-H. Gu, Z.-G. Shen, J.-X. Wang, *ACS Sustainable Chem. Eng.* 2023, **11**, 7586–7595.

22. M. Huang, Z. Wu, S. An, X. Pang, B. Li, T. Lin, H. Wang, B. Qi, Y. F. Song, *Small* 2025, **21**, e06717.
23. M. Imran, W. A. Al-Masry, A. Mahmood, A. Hassan, S. Haider, S. M. Ramay, *Polym. Degrad. Stab.* 2013, **98**, 904–915.
24. G. Park, L. Bartolome, K. G. Lee, S. J. Lee, D. H. Kim, T. J. Park, *Nanoscale* 2012, **4**, 3879–3885.
25. L. Bartolome, M. Imran, K. G. Lee, A. Sangalang, J. K. Ahn, D. H. Kim, *Green Chem.* 2014, **16**, 279–286.
26. Y. Liu, X. Yao, H. Yao, Q. Zhou, J. Xin, X. Lu, S. Zhang, *Green Chem.* 2020, **22**, 3122–3131.
27. Y. Liu, Q. Zhong, P. Xu, H. Huang, F. Yang, M. Cao, L. He, Q. Zhang, J. Chen, *Matter* 2022, **5**, 1305–1317.
28. L. Wang, G. A. Nelson, J. Toland, J. D. Holbrey, *ACS Sustainable Chem. Eng.* 2020, **8**, 13362–13368.
29. K. Fukushima, O. Coulembier, J. M. Lecuyer, H. A. Almegren, A. M. Alabdulrahman, F. D. Alsewailem, M. A. Mcneil, P. Dubois, R. M. Waymouth, H. W. Horn, *J. Polym. Sci. Pol. Chem.* 2011, **49**, 1273–1281.
30. R. Esquer, J. J. García, *J. Organomet. Chem.* 2019, **902**, 120972.
31. Y. Luo, E. Selvam, D. G. Vlachos, M. Ierapetritou, *ACS Sustainable Chem. Eng.* 2023, **11**, 4209–4218.
32. M. Chu, P. Yan, Y. Zhou, X. Lou, C. Li, M. Cao, L. He, Q. Zhang, J. Chen, *Adv. Funct. Mater.* 2025, **35**, 2417644.
33. J. Ruan, Q. Cao, X. Li, Q. Ren, M. Li, S. Dong, N. Li, Q. Xu, H. Li, J. Lu, *Adv. Mater.* 2025, **37**, 2500090.
34. X. Lou, P. Yan, B. Jiao, Q. Li, P. Xu, L. Wang, L. Zhang, M. Cao, G. Wang, Z. Chen, *Nat. Commun.* 2024, **15**, 273.
